# Supplementary material for: Cyanide-bridged iron complexes as biomimetics of tri-iron arrangements in maturases of the H cluster of the di-iron hydrogenase
Source: Royal Society of Chemistry journal article supplement (doi:10.1039/c6sc00213g), 2016-01-01
Supplement: c6sc00213g1.pdf [file c6sc00213g1.pdf]

## Supplemental Information

### **Cyanide-Bridged Iron Complexes as Biomimetics of Tri-iron Arrangements in Maturases of the H cluster of the Diiron Hydrogenase**

Allen M. Lunsford<sup>†</sup>, Christopher C. Beto<sup>†a</sup>, Shengda Ding<sup>†</sup>, Özlen F. Erdem<sup>δ</sup>,  
Ning Wang<sup>†b</sup>, Nattamai Bhuvanesh<sup>†</sup>, Michael B. Hall<sup>†</sup> and Marcetta Y. Darensbourg<sup>†\*</sup>

<sup>†</sup>*Department of Chemistry, Texas A & M University, College Station, TX 77843, United States*

<sup>δ</sup>*Department of Physics, Middle East Technical University, 06800 Ankara, Turkey*

E-mail: [marcetta@chem.tamu.edu](mailto:marcetta@chem.tamu.edu)

## Cyclic Voltammetry

### Full Scans

|                                                        |   |
|--------------------------------------------------------|---|
| <b>Figure S1.</b> Full scan of Compound <b>A</b> ..... | 4 |
| <b>Figure S2.</b> Full scan of Compound <b>B</b> ..... | 5 |
| <b>Figure S3.</b> Full scan of Compound <b>C</b> ..... | 6 |
| <b>Figure S4.</b> Full scan of Compound <b>D</b> ..... | 7 |

### Variable Scan Rates

|                                                                                       |    |
|---------------------------------------------------------------------------------------|----|
| <b>Figure S5.</b> Full scan of Compound <b>A</b> at increasing scan rates .....       | 8  |
| <b>Figure S6.</b> Cathodic region of Compound <b>C</b> at increasing scan rates ..... | 9  |
| <b>Figure S7.</b> Full scan of Compound <b>D</b> at increasing scan rates .....       | 10 |

### Scan Reversals

|                                                                                                                    |    |
|--------------------------------------------------------------------------------------------------------------------|----|
| <b>Figure S8.</b> Scan reversals of compound <b>A</b> .....                                                        | 11 |
| <b>Figure S9.</b> Full scan of Compound <b>B</b> initiating the scan in the negative and positive direction .....  | 12 |
| <b>Figure S10.</b> Full scan of Compound <b>C</b> initiating the scan in the negative and positive direction ..... | 13 |
| <b>Figure S11.</b> Full scan of Compound <b>D</b> initiating the scan in the negative and positive direction.....  | 14 |

### IR Spectrum of Compounds A-D and Cleavage Reactions

|                                                                                                           |    |
|-----------------------------------------------------------------------------------------------------------|----|
| <b>Figure S12.</b> Stacked normalized IR plots of Compounds <b>A-D</b> in DCM.....                        | 15 |
| <b>Figure S13.</b> IR spectrum of the cleavage of Compound <b>A</b> using $\text{PMe}_3$ .....            | 16 |
| <b>Figure S14.</b> IR spectrum of the cleavage of Compound <b>A</b> using tetraethylammonium cyanide..... | 17 |
| <b>Figure S15.</b> IR spectrum of the cleavage of Compound <b>B</b> using $\text{PMe}_3$ .....            | 18 |
| <b>Figure S16.</b> IR spectrum of the cleavage of Compound <b>B</b> using tetraethylammonium cyanide..... | 19 |
| <b>Figure S17.</b> IR spectrum of the cleavage of Compound <b>C</b> using $\text{PMe}_3$ .....            | 20 |
| <b>Figure S18.</b> IR spectrum of the cleavage of Compound <b>C</b> using tetraethylammonium cyanide..... | 21 |

### NMRs of Compounds A-D

|                                                                                               |    |
|-----------------------------------------------------------------------------------------------|----|
| <b>Figure S19.</b> $^1\text{H}$ NMR of Compound <b>A</b> in $\text{CD}_3\text{OD}$ .....      | 22 |
| <b>Figure S20.</b> $^1\text{H}$ NMR of Compound <b>B</b> in $\text{CDCl}_3$ .....             | 23 |
| <b>Figure S21.</b> $^{31}\text{P}$ NMR of Compound <b>B</b> in $\text{CDCl}_3$ .....          | 23 |
| <b>Figure S22.</b> $^1\text{H}$ NMR of Compound <b>C</b> in $\text{CD}_2\text{Cl}_2$ .....    | 24 |
| <b>Figure S23.</b> $^1\text{H}$ NMR of Compound <b>D</b> in $\text{CD}_2\text{Cl}_2$ .....    | 25 |
| <b>Figure S24.</b> $^{31}\text{P}$ NMR of Compound <b>D</b> in $\text{CD}_2\text{Cl}_2$ ..... | 26 |

### EPR

|                                                                                                             |    |
|-------------------------------------------------------------------------------------------------------------|----|
| <b>Figure S25.</b> The spin density contour plot of oxidized <b>D</b> <sup>+</sup> calculated by B3LYP..... | 27 |
| <b>Figure S26.</b> X-band 14N HYSCORE spectrum of <b>D</b> <sup>+</sup> .....                               | 28 |

## Crystallographic Images

|                                                                                                                                                                        |    |
|------------------------------------------------------------------------------------------------------------------------------------------------------------------------|----|
| <b>Figure S27.</b> Structures for compounds <b>A-D</b> as determined by X-ray diffraction experiments with the analogous chemdraw structures.....                      | 29 |
| <b>Figure S28.</b> Comparison of the shape of the thermal ellipsoid plots and resulting refinement factor for the two cyanide orientations for Compound <b>A</b> ..... | 30 |
| <b>Figure S29.</b> Comparison of the shape of the thermal ellipsoid plots and resulting refinement factor for the two cyanide orientations for Compound <b>B</b> ..... | 30 |
| <b>Figure S30.</b> Comparison of the shape of the thermal ellipsoid plots and resulting refinement factor for the two cyanide orientations for Compound <b>C</b> ..... | 31 |
| <b>Figure S31.</b> Comparison of the shape of the thermal ellipsoid plots and resulting refinement factor for the two cyanide orientations for Compound <b>D</b> ..... | 31 |
| <b>Figure S32.</b> Thermal ellipsoid plot at 50% probability for <b>A</b> .....                                                                                        | 37 |
| <b>Figure S33.</b> Thermal ellipsoid plot at 50% probability for <b>B</b> .....                                                                                        | 39 |
| <b>Figure S34.</b> Thermal ellipsoid plot at 50% probability for <b>C</b> .....                                                                                        | 41 |
| <b>Figure S35.</b> Thermal ellipsoid plot at 50% probability for <b>D</b> .....                                                                                        | 43 |

## Tables of Bond Distances and Angles Obtained from the Crystal Structures, IR Frequencies, and EPR Parameters

|                                                                                                                 |    |
|-----------------------------------------------------------------------------------------------------------------|----|
| <b>Table S1.</b> Selected metric data of optimized structures in comparison to experimental values.....         | 32 |
| <b>Table S2.</b> Computational IR frequencies in comparison with experimental values.....                       | 33 |
| <b>Table S3.</b> Computational EPR parameters in comparison with experimental values.....                       | 34 |
| <b>Table S4.</b> Energy profiles (Gibbs free energy in kcal/mol) of cyanide flipping with H-bond providers..... | 35 |
| <b>Table S5.</b> Crystal data and structure refinement for Compound <b>A</b> .....                              | 36 |
| <b>Table S6.</b> Crystal data and structure refinement for Compound <b>B</b> .....                              | 38 |
| <b>Table S7.</b> Crystal data and structure refinement for Compound <b>C</b> .....                              | 40 |
| <b>Table S8.</b> Crystal data and structure refinement for Compound <b>D</b> .....                              | 42 |

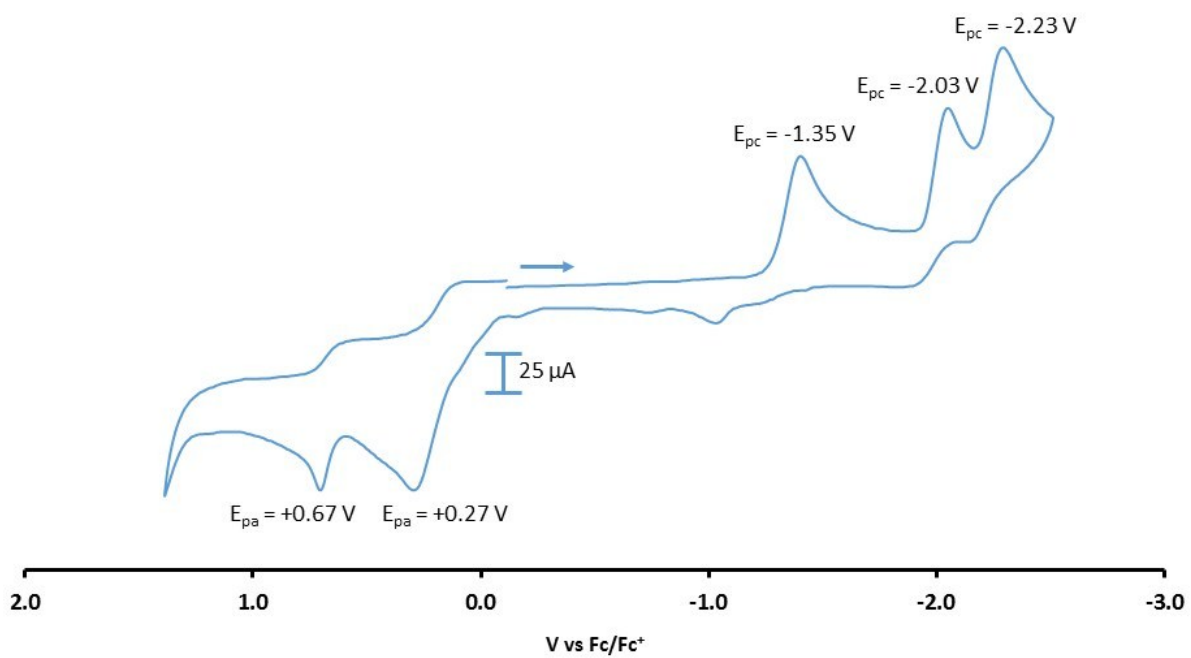

**Figure S1.** Full scan of Compound A at 200 mV/s in MeCN referenced to internal Fc/Fc<sup>+</sup> = 0.

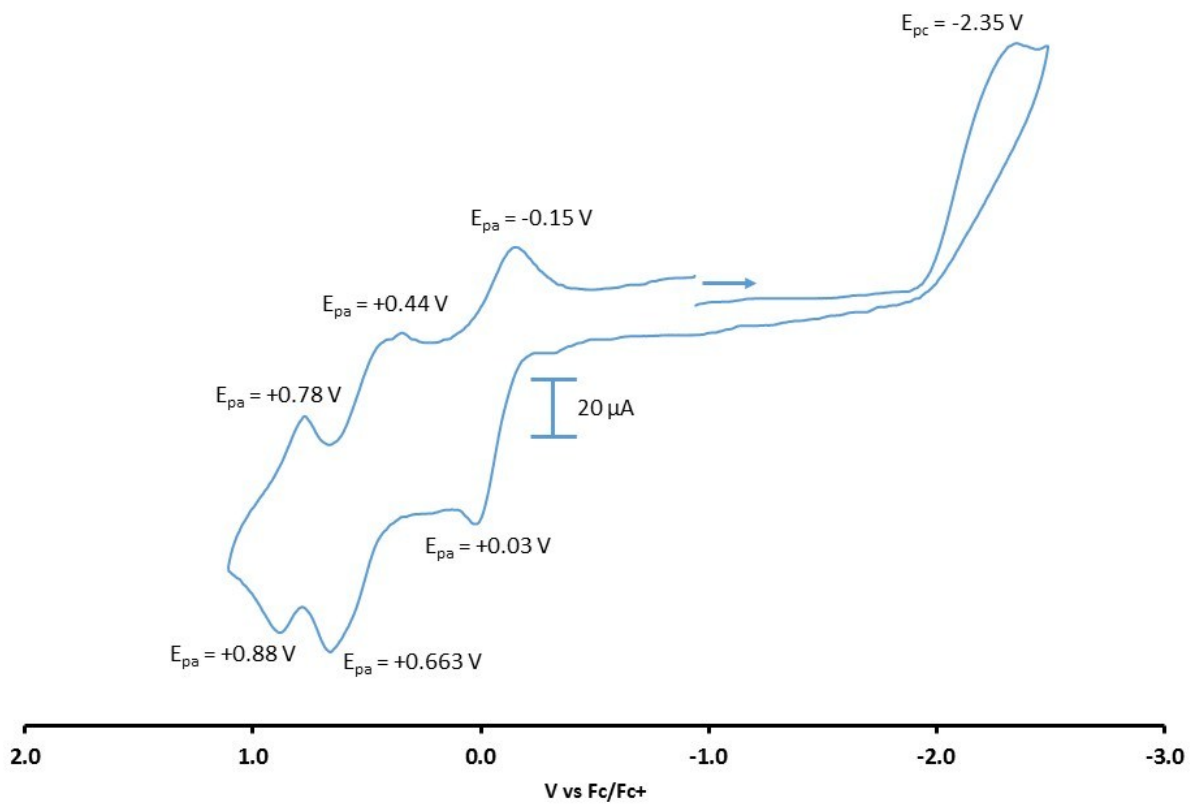

**Figure S2.** Full scan of Compound **B** at 200 mV/s in DCM referenced to internal Fc/Fc<sup>+</sup> = 0.

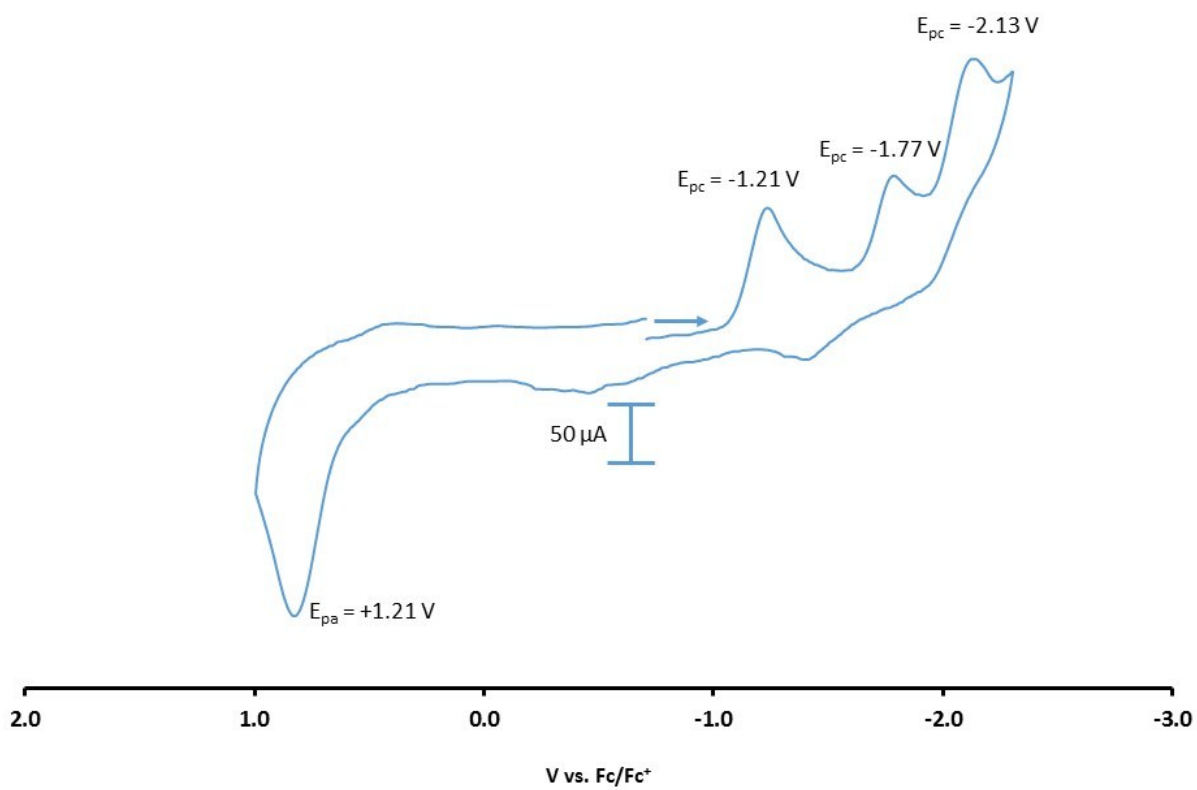

**Figure S3.** Full scan of Compound C at 200 mV/s in DCM referenced to internal Fc/Fc<sup>+</sup> = 0.

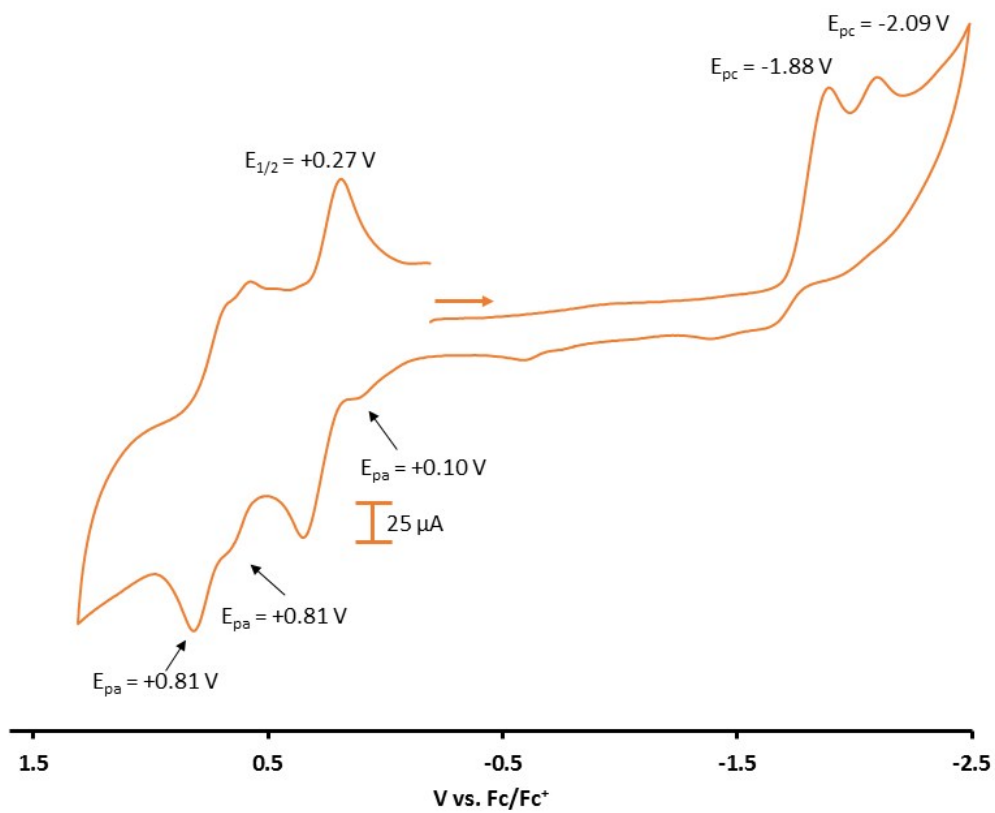

**Figure S4.** Full scan of Compound **D** at 200 mV/s initiating the scan in the negative direction (top) and the positive direction (bottom) in DCM referenced to internal Fc/Fc<sup>+</sup> = 0.

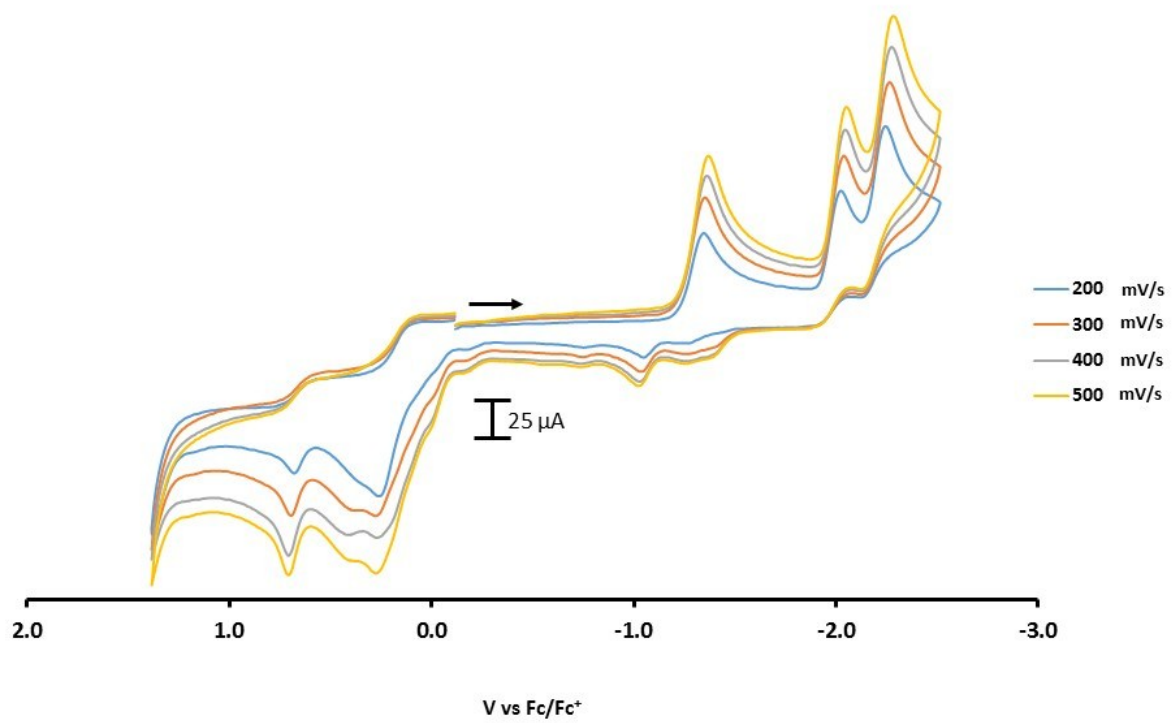

**Figure S5.** Full scan of Compound A at increasing scan rates in MeCN referenced to internal Fc/Fc<sup>+</sup> = 0.



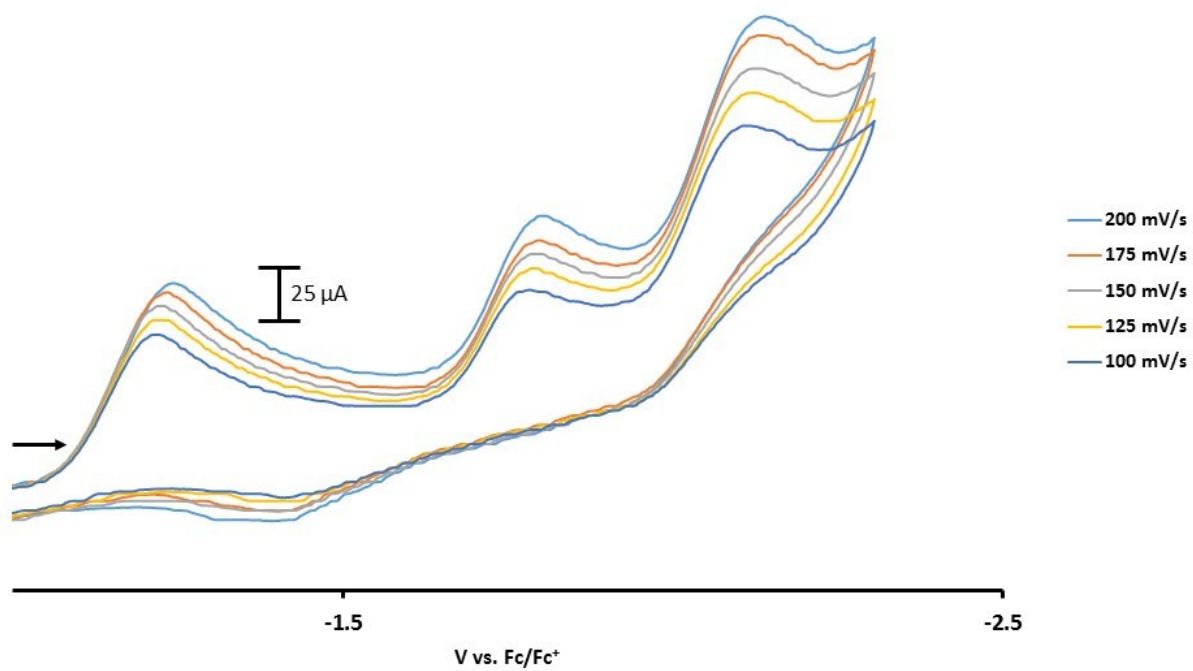

**Figure S6.** Cathodic region of Compound C at increasing scan rates in DCM referenced to internal Fc/Fc<sup>+</sup> = 0.

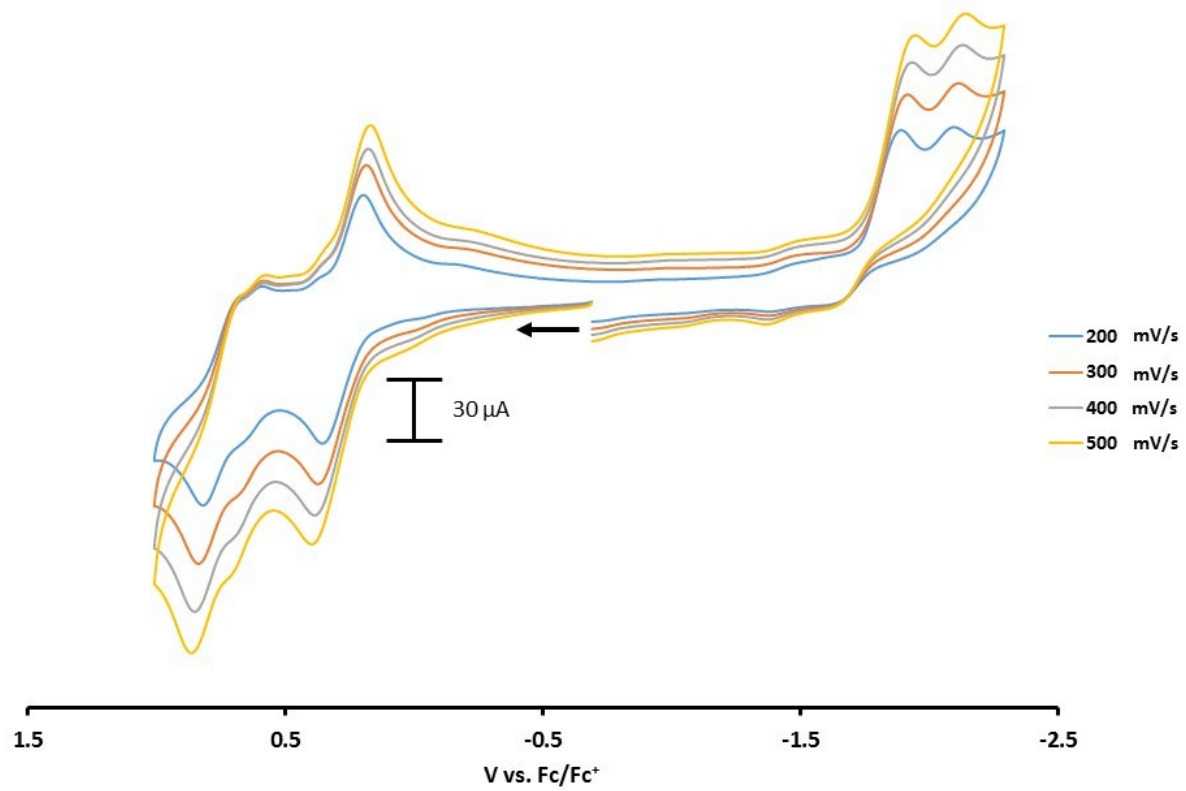

**Figure S7.** Full scan of Compound **D** at increasing scan rates in DCM referenced to internal Fc/Fc<sup>+</sup> = 0.

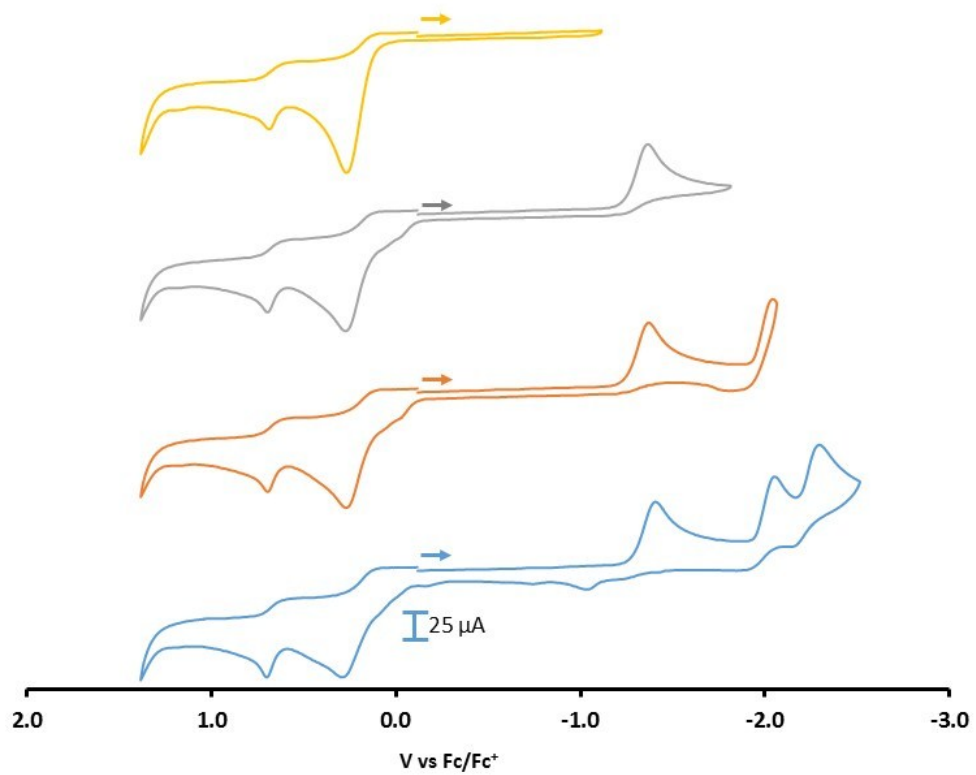

**Figure S8.** Scan reversals of Compound **A** isolating each reduction event and observing the effect on the anodic region in MeCN referenced to internal  $\text{Fc}/\text{Fc}^+ = 0$ .

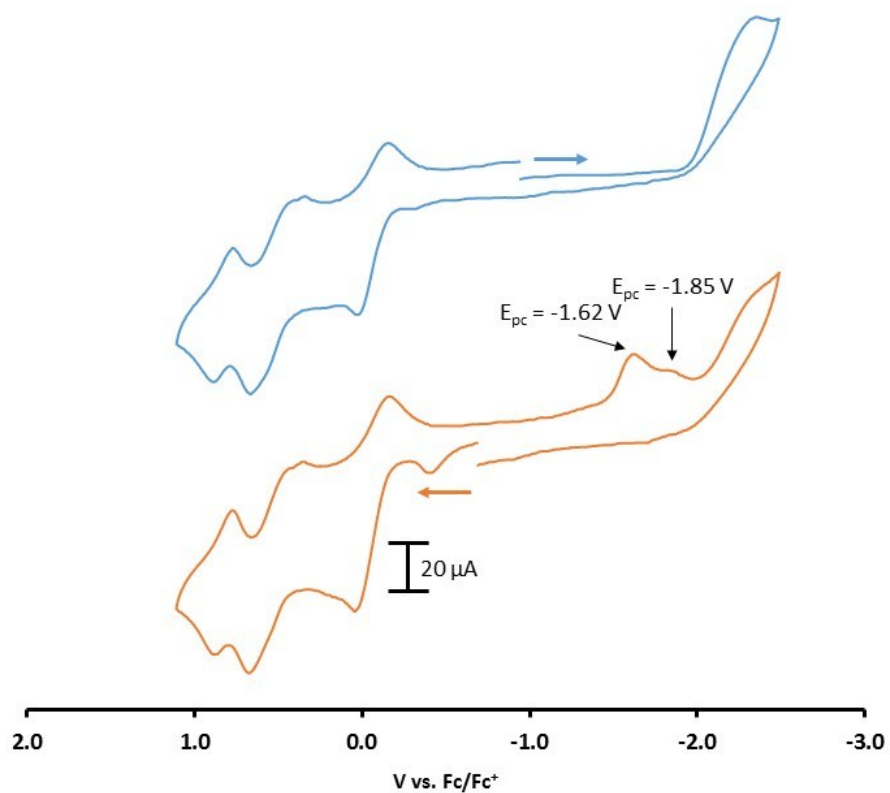

**Figure S9.** Full scan of Compound **B** at  $200 \text{ mV/s}$  initiating the scan in the negative direction (top) and the positive direction (bottom) in DCM referenced to internal  $Fc/Fc^+ = 0$ .

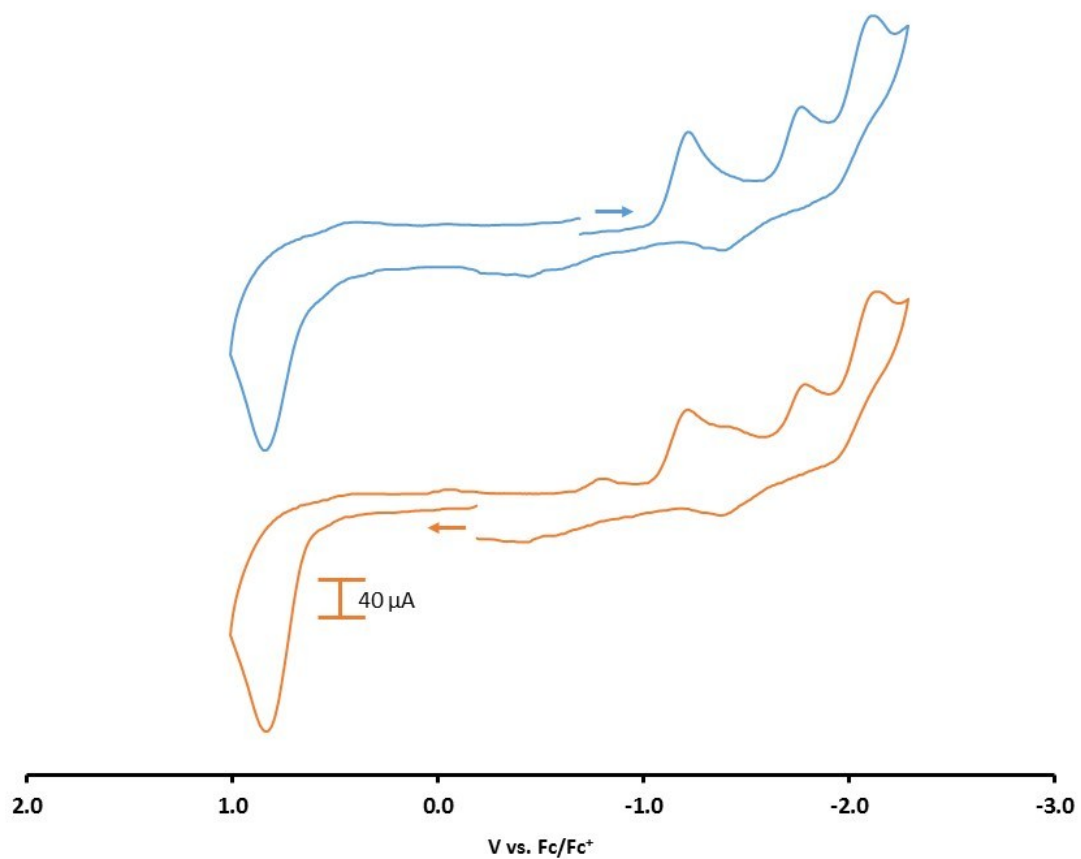

**Figure S10.** Full scan of Compound C at 200 mV/s initiating the scan in the negative direction (top) and the positive direction (bottom) in DCM referenced to internal Fc/Fc<sup>+</sup> = 0.

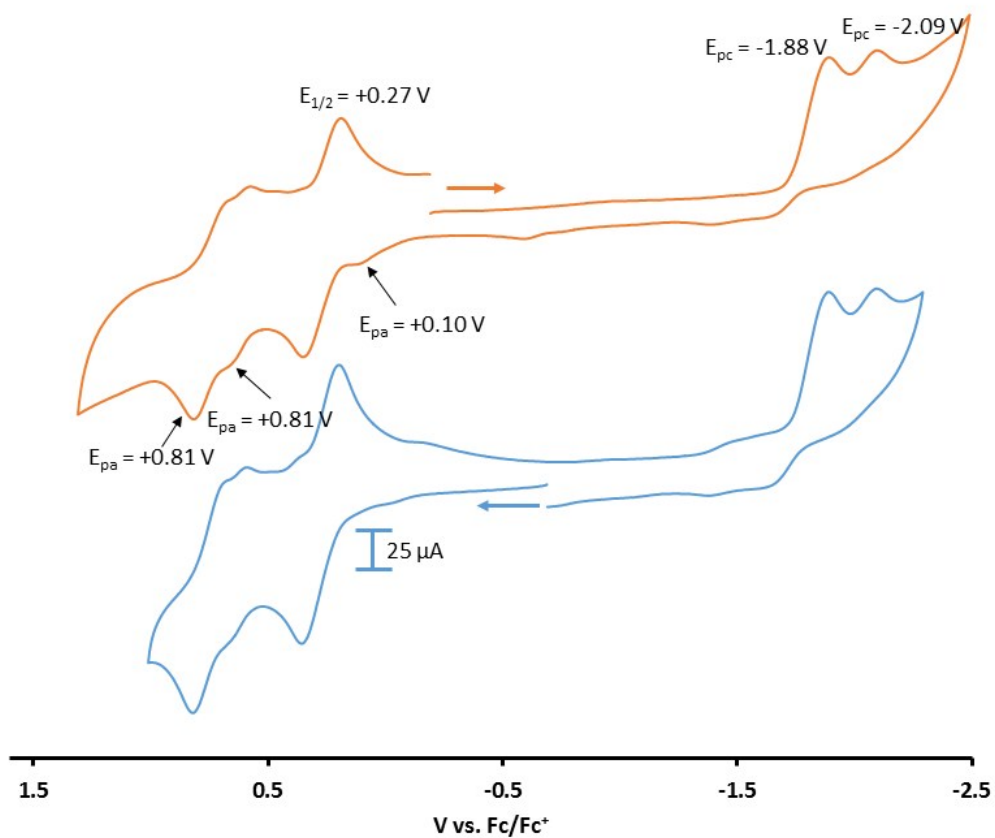

**Figure S11.** Full scan of Compound **D** at 200 mV/s initiating the scan in the negative direction (top) and the positive direction (bottom) in DCM referenced to internal Fc/Fc<sup>+</sup> = 0.

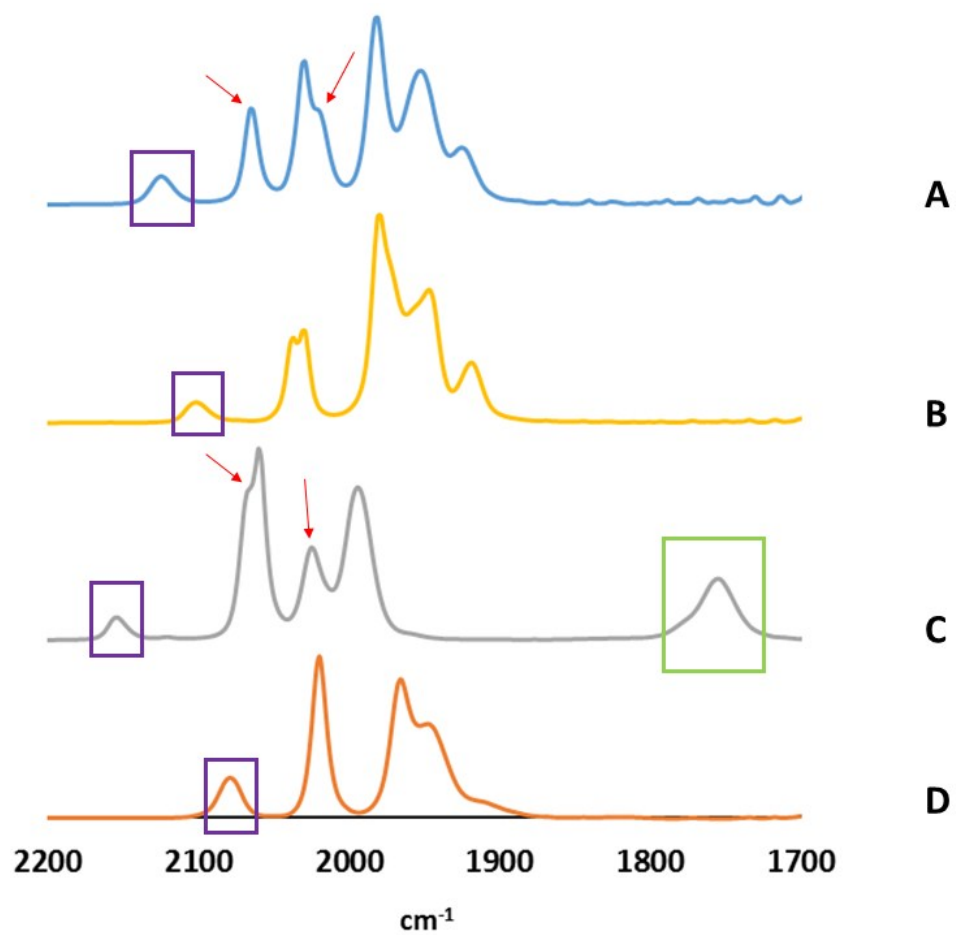

**Figure S12.** Stacked normalized IR plots of Compounds **A-D** in DCM. Red arrows denote CO stretches on the CpFe unit, purple boxes denote bridging cyanide bands, and the green box denotes the NO stretch.

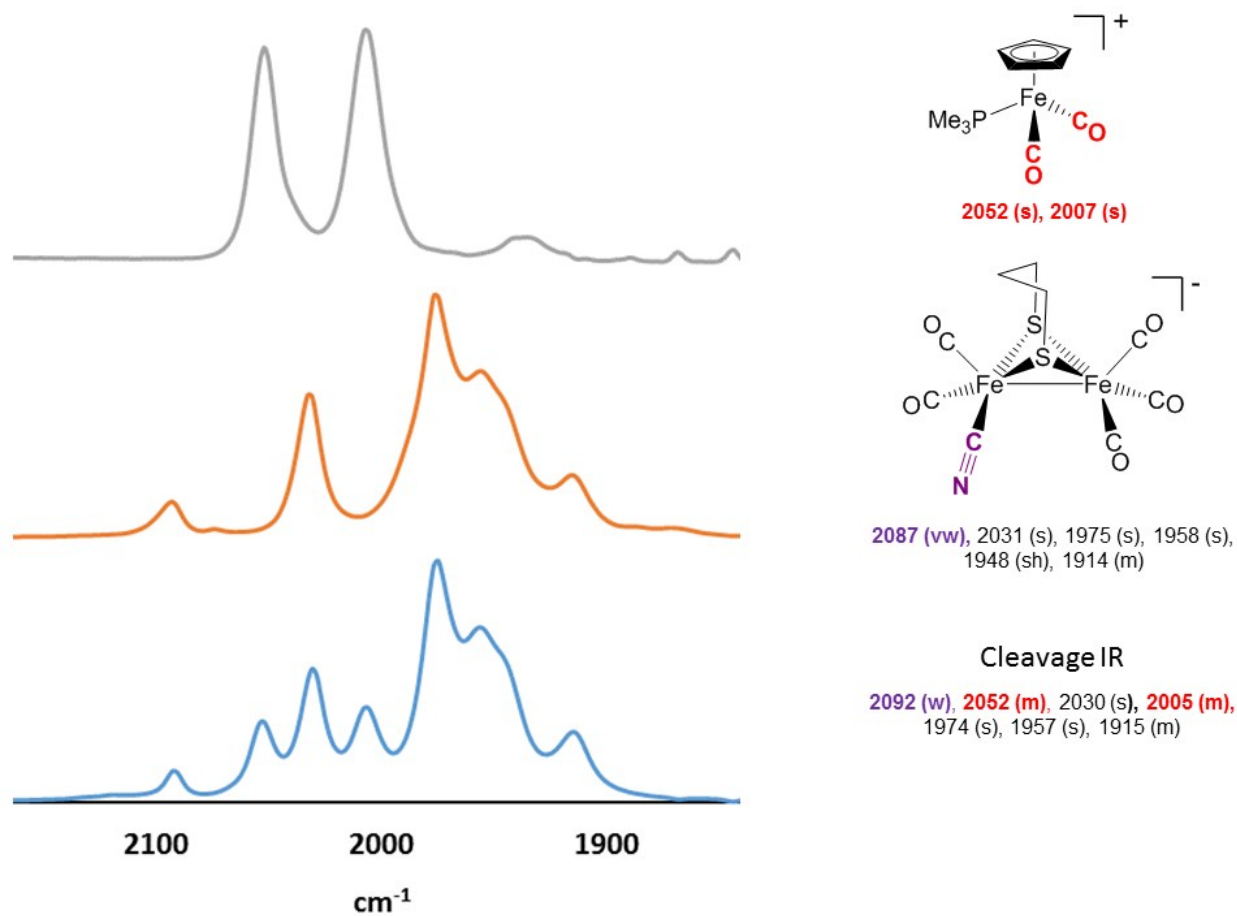

**Figure S13.** IR spectrum in THF of the cleavage of Compound A using PMe<sub>3</sub>.



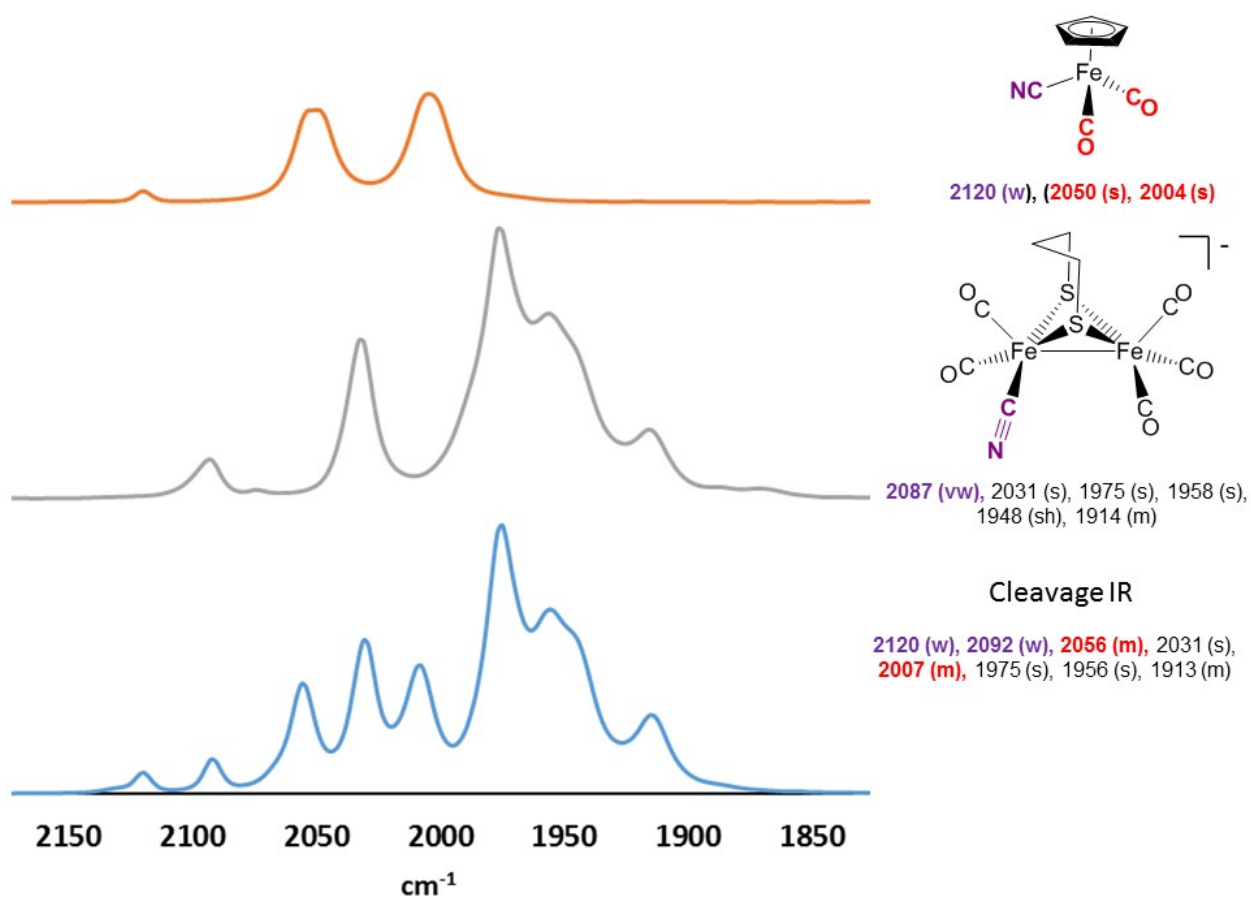

**Figure S14.** IR spectrum in THF of the cleavage of Compound **A** using tetraethylammonium cyanide.

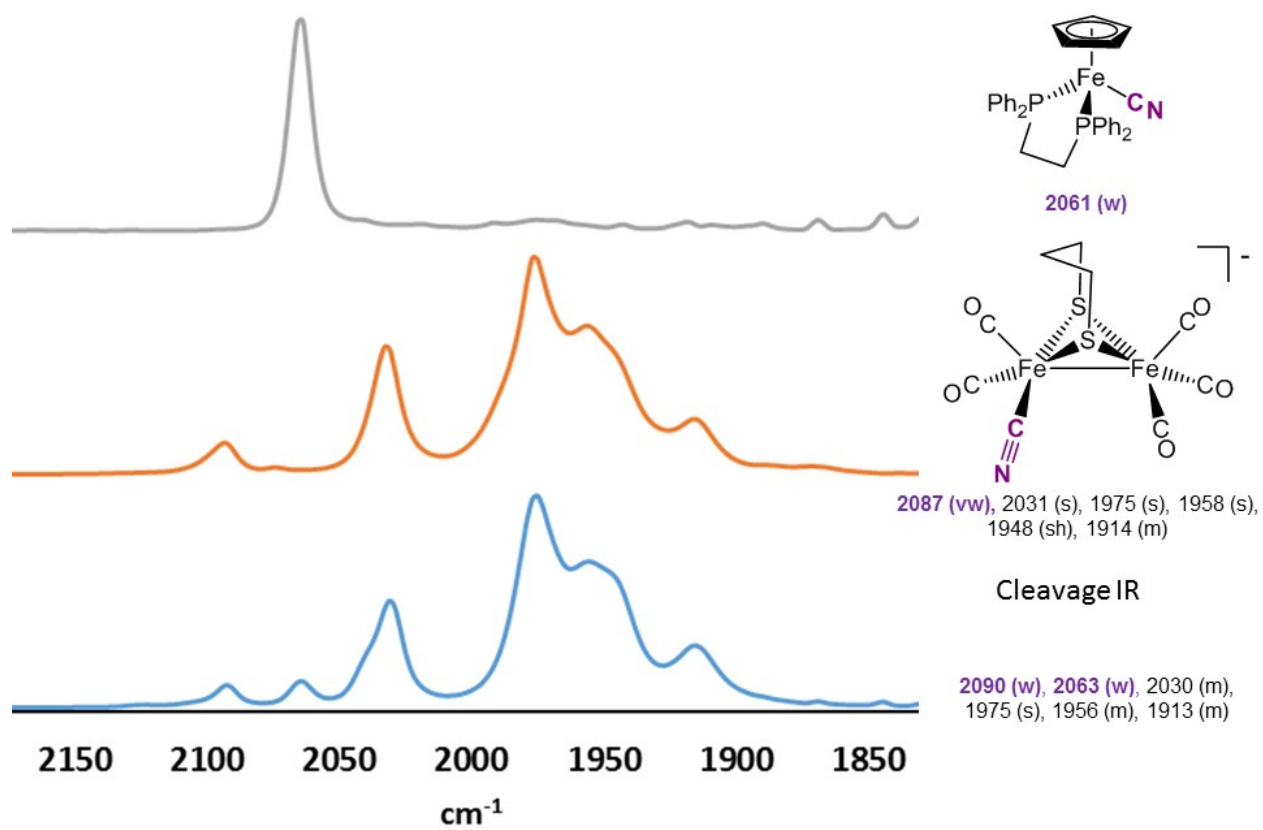

Figure S15. IR spectrum in THF of the cleavage of Compound **B** using  $\text{PMe}_3$ .

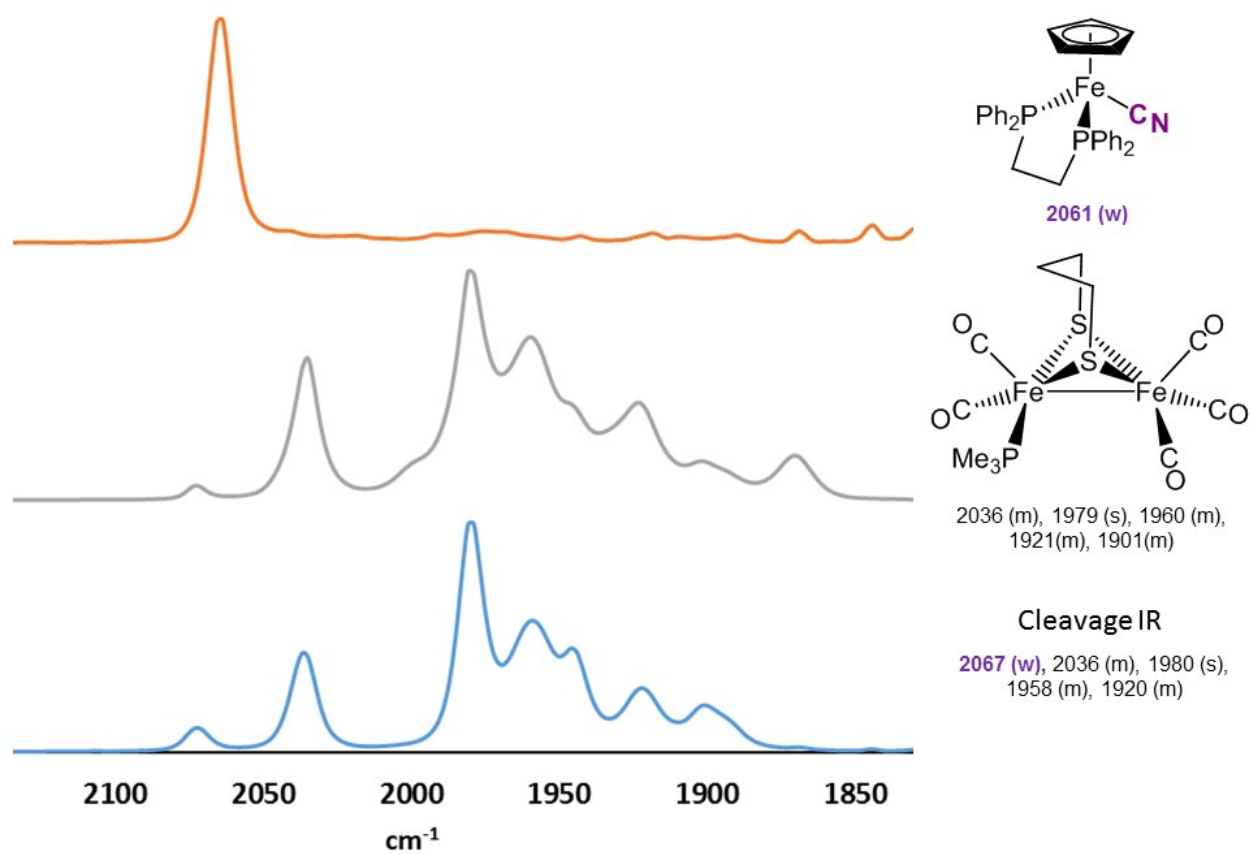

**Figure S16.** IR spectrum in THF of the cleavage of Compound **B** using tetraethylammonium cyanide.

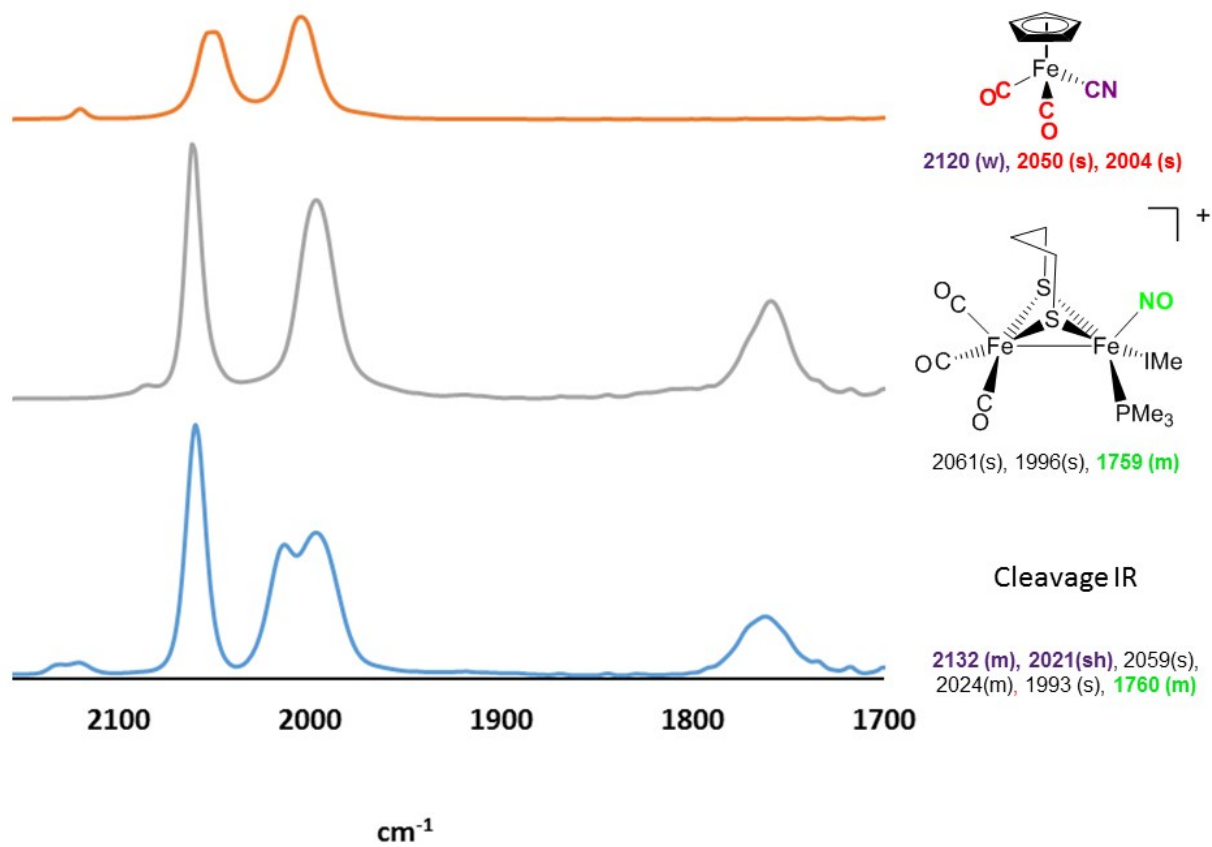

Figure S17. IR spectrum in THF of the cleavage of Compound C using  $\text{PMe}_3$ .

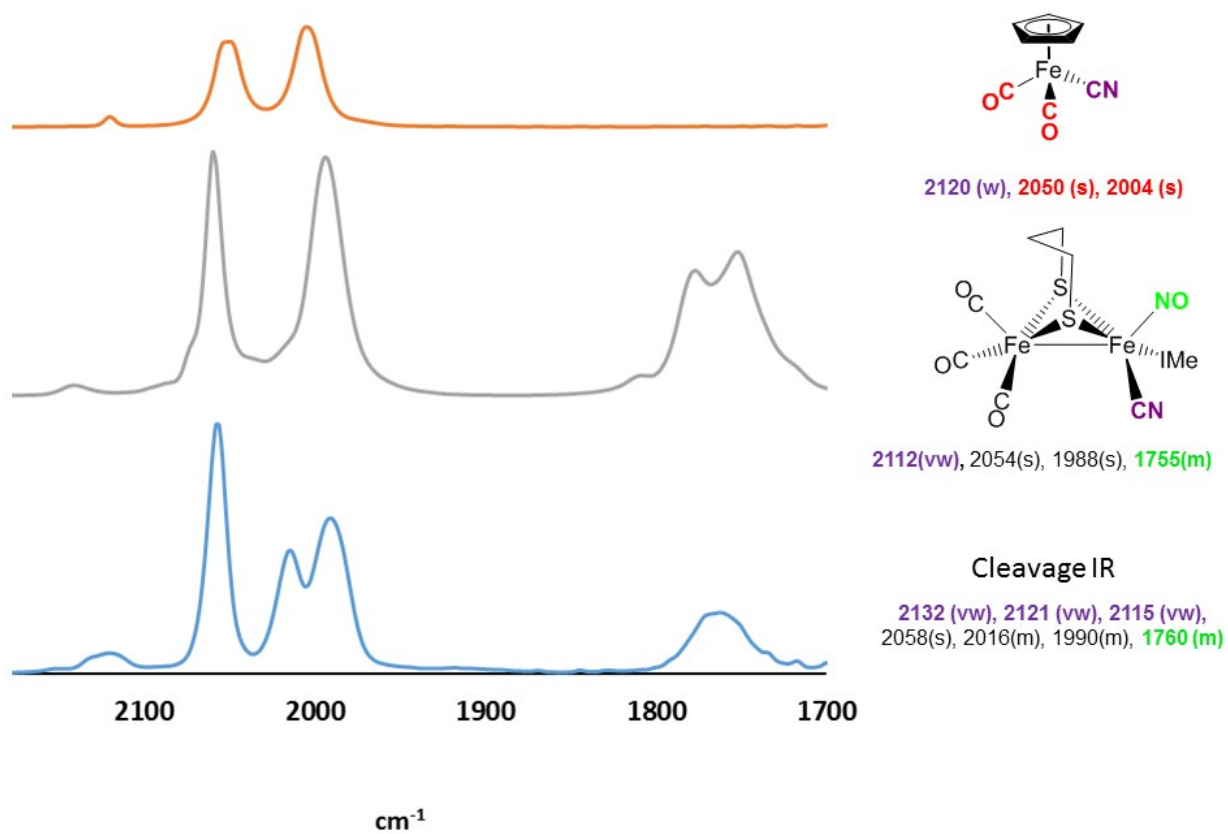

**Figure S18.** IR spectrum in THF of the cleavage of Compound **C** using tetraethylammonium cyanide.

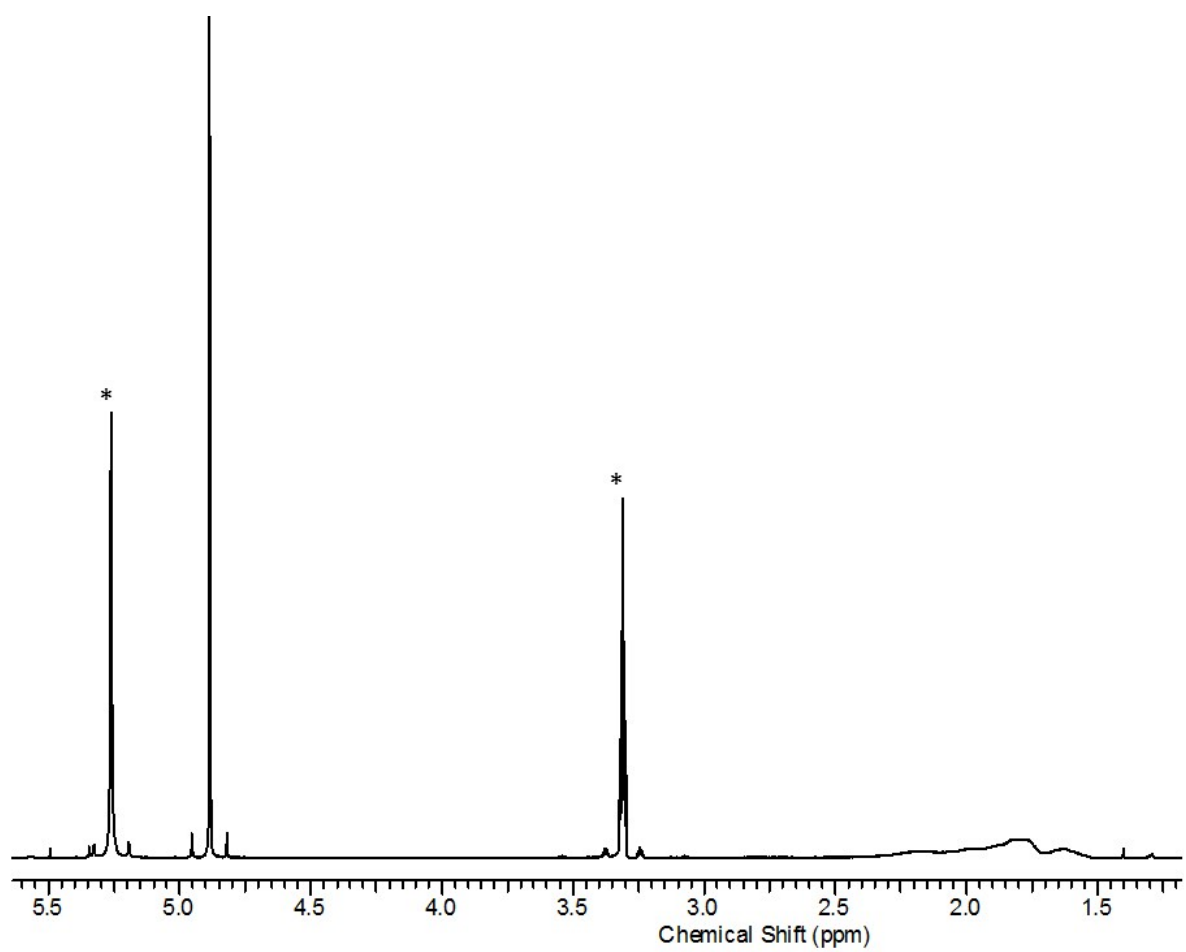

**Figure S19.**  $^1\text{H}$  NMR of Compound **A** in  $\text{CD}_3\text{OD}$ . Asterisk denotes residual protonated MeOH.

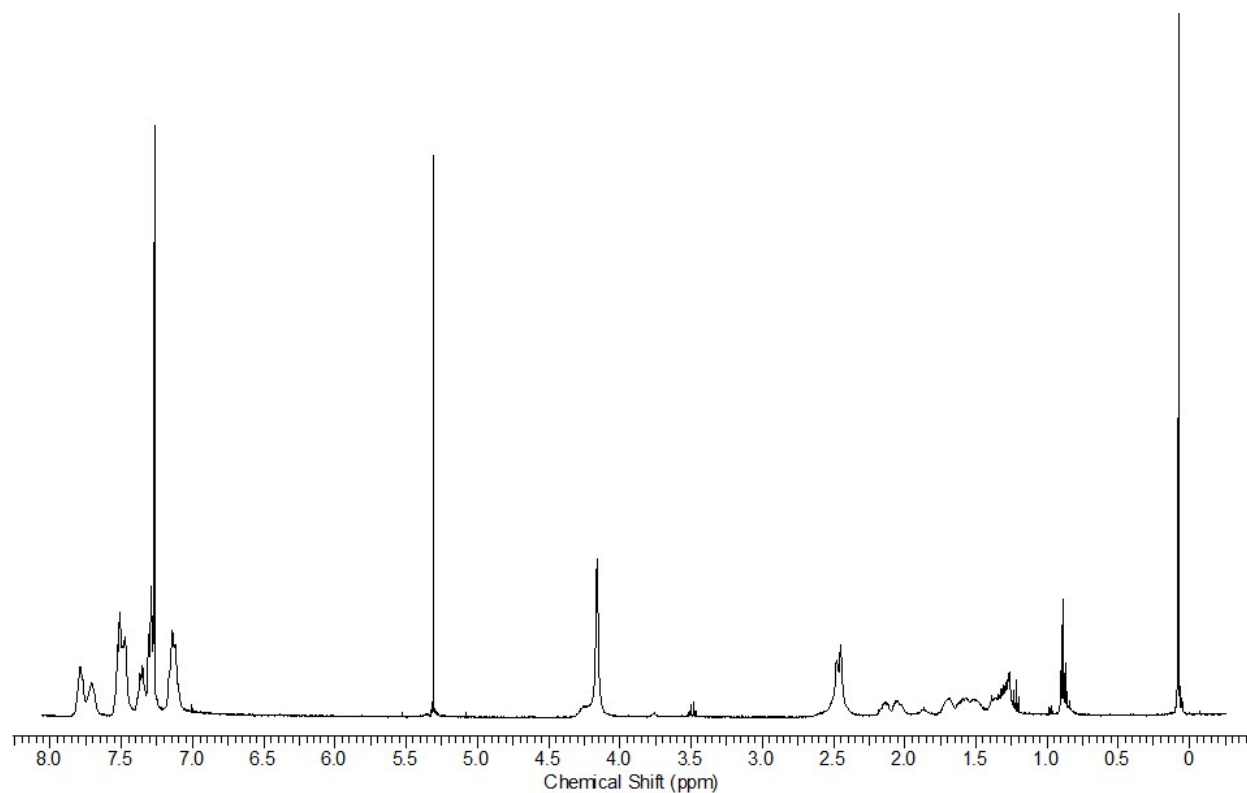

**Figure S20.**  $^1\text{H}$  NMR of Compound **B** in  $\text{CDCl}_3$ .

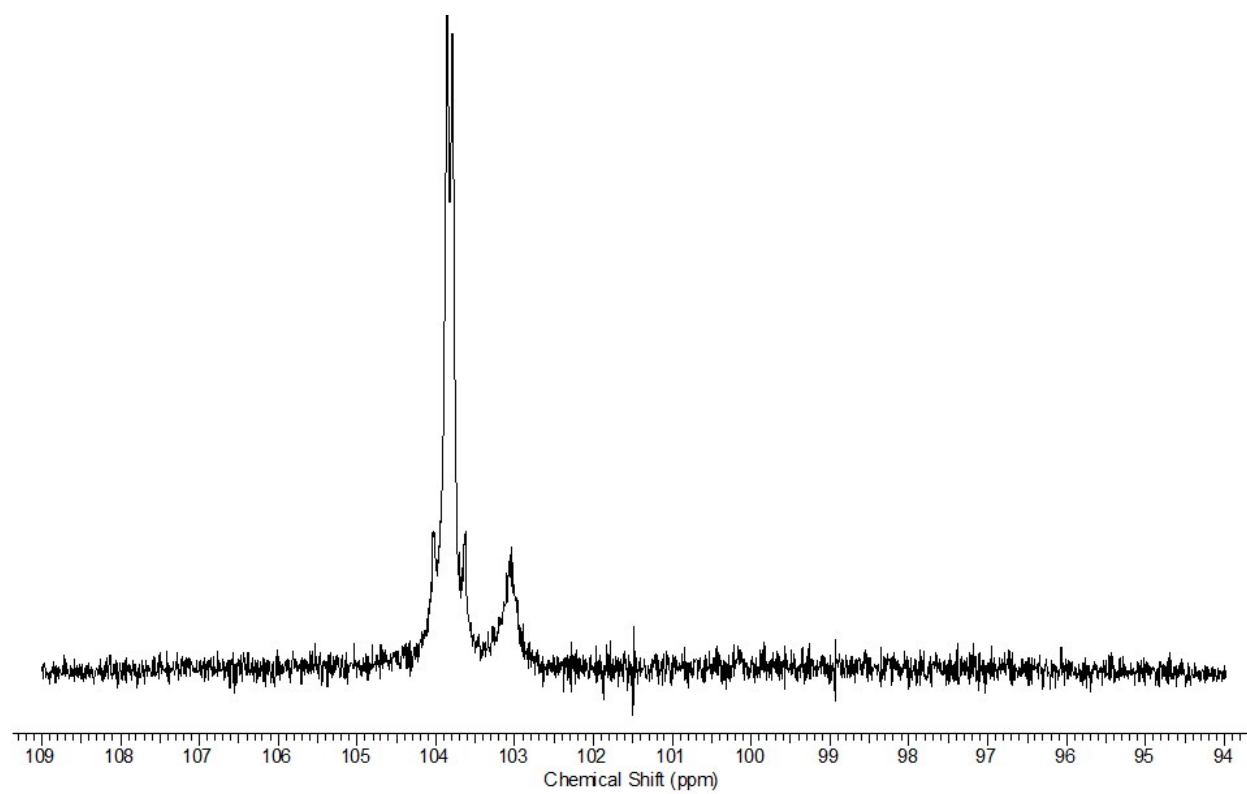

**Figure S21.**  $^{31}\text{P}$  NMR of Compound **B** in  $\text{CDCl}_3$ .

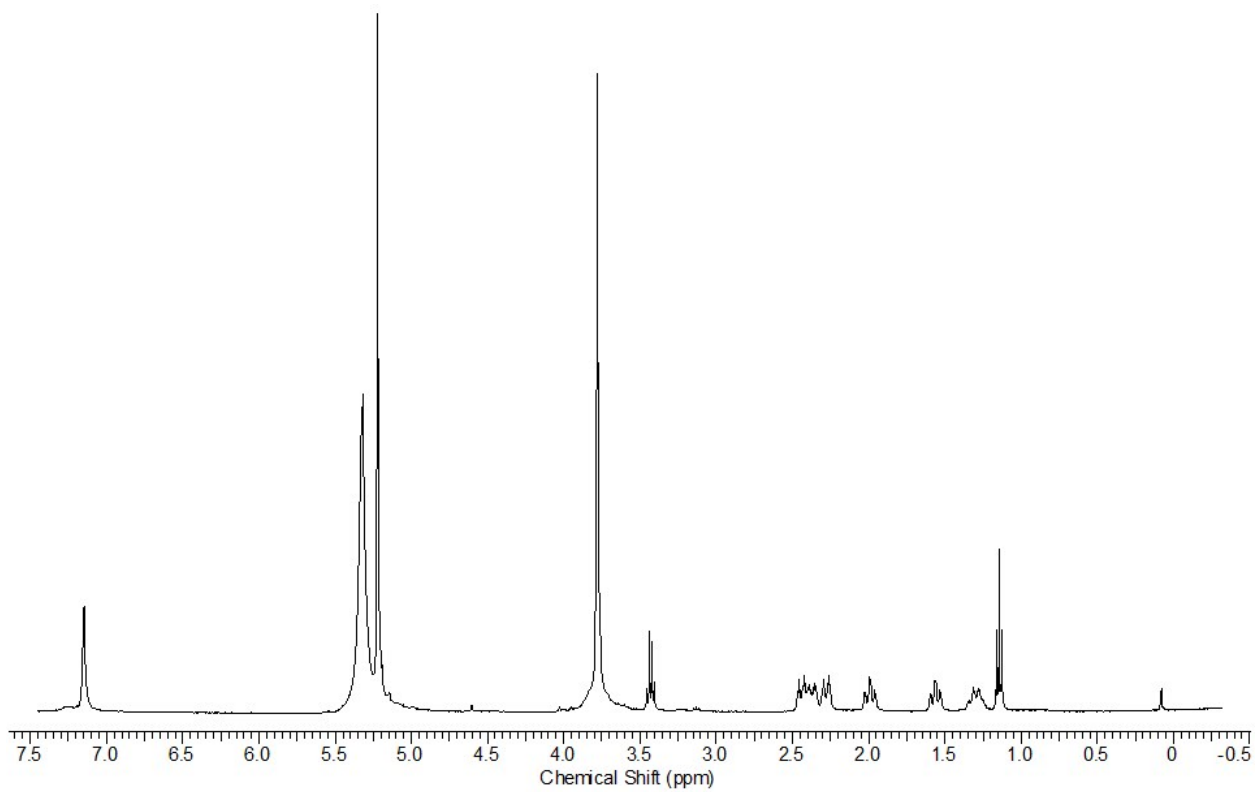

**Figure S22.**  $^1\text{H}$  NMR of Compound C in  $\text{CD}_2\text{Cl}_2$ .



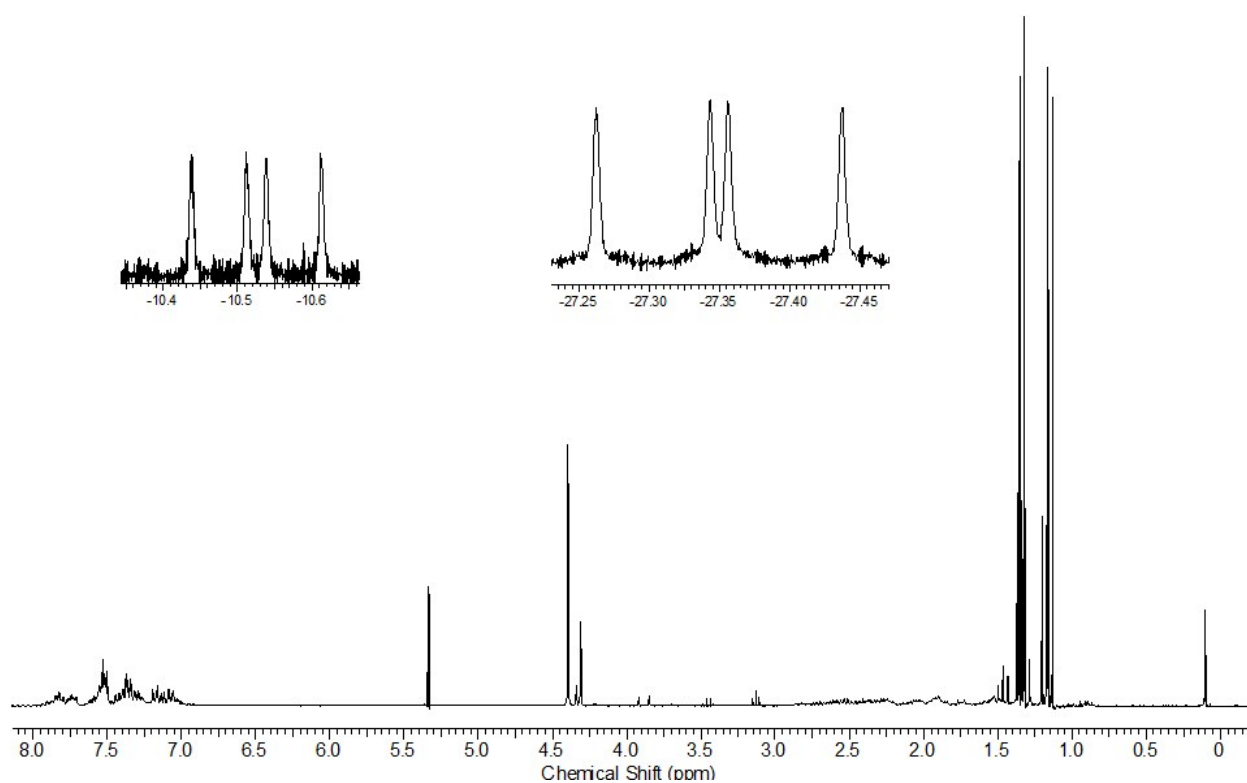

**Figure S23.**  $^1\text{H}$  NMR of Compound **D** in  $\text{CD}_2\text{Cl}_2$ . The hydric upfield region is displayed in the insets.

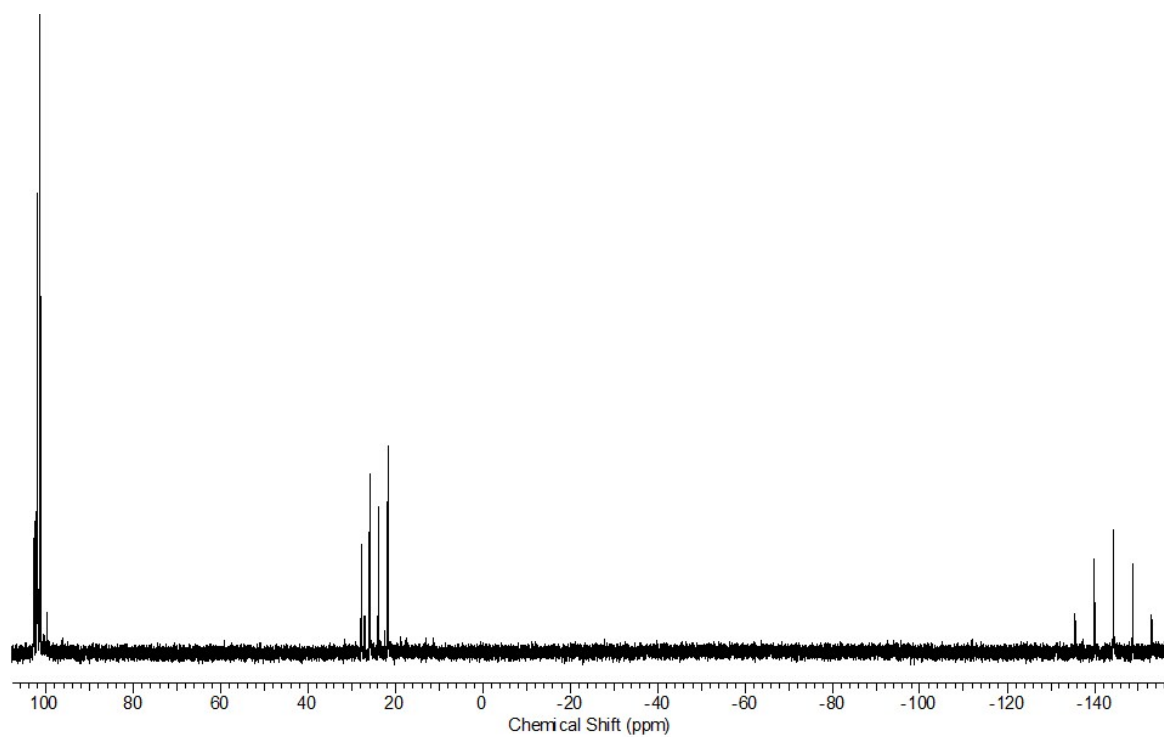

**Figure S24.**  $^{31}\text{P}$  NMR of Compound **D** in  $\text{CD}_2\text{Cl}_2$

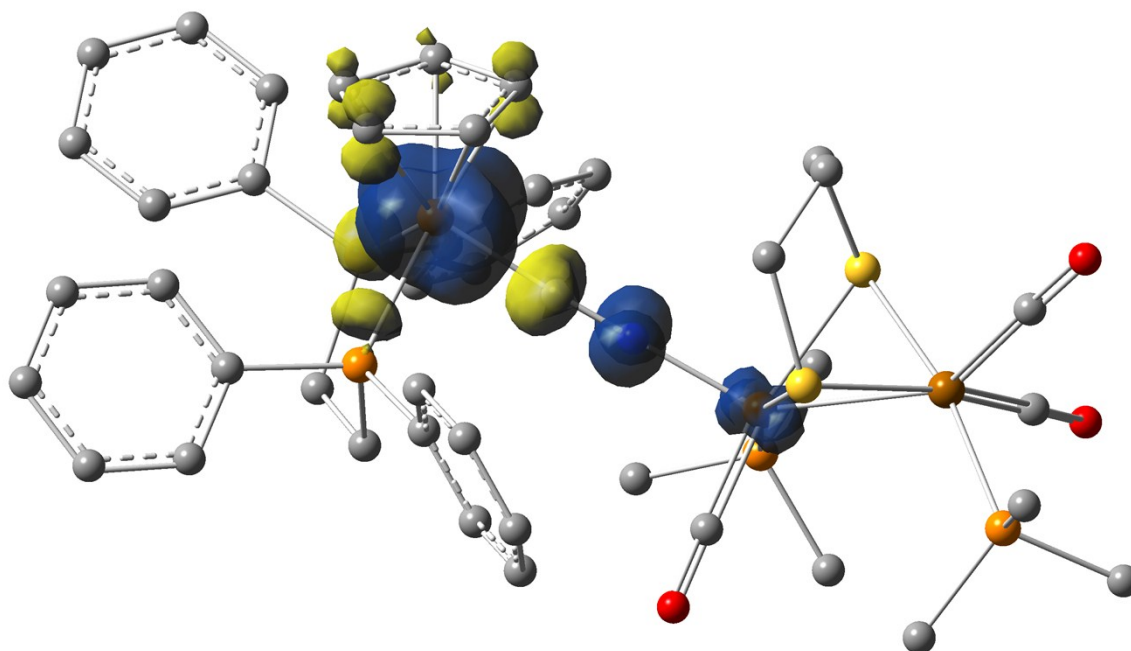

**Figure S25.** The spin density contour plot of oxidized **D**. (isovalue: 0.0025), calculated by B3LYP. The calculations show the majority of the unpaired spin is on the iron of the mono-iron moiety, with spin density of 1.163 e, while minor excess spins are on two other irons, bridging cyanide and cyclopentadienyl. The g vector was derived from the calculated g tensor and estimated to be (2.018, 2.068 and 2.235). Also see table S3.

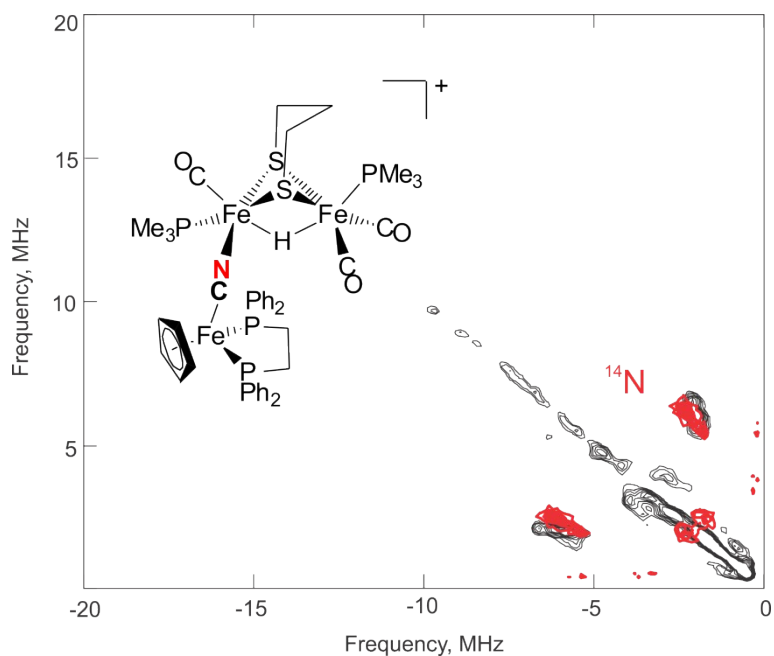

**Figure S26.** X-band HYSCORE spectrum of electrochemically oxidized (with 0.65 V) complex,  $\mathbf{D}^+$ , in DCM at 10K. Simulation (in red) parameters (with Easyspin):  $g(1, 2, 3) = (2.191, 2.089, 2.024)$ ;  $^{14}\text{N}$  HFC,  $A_{\text{iso}} = 3$  MHz,  $K = 0.5$ ;  $\eta = 0.1$ ;  $\tau = 200\text{ns}$ : Field position = 343.8 mT (corresponding to  $g_2$ ); Micro wave frequency = 9.78651 GHz.

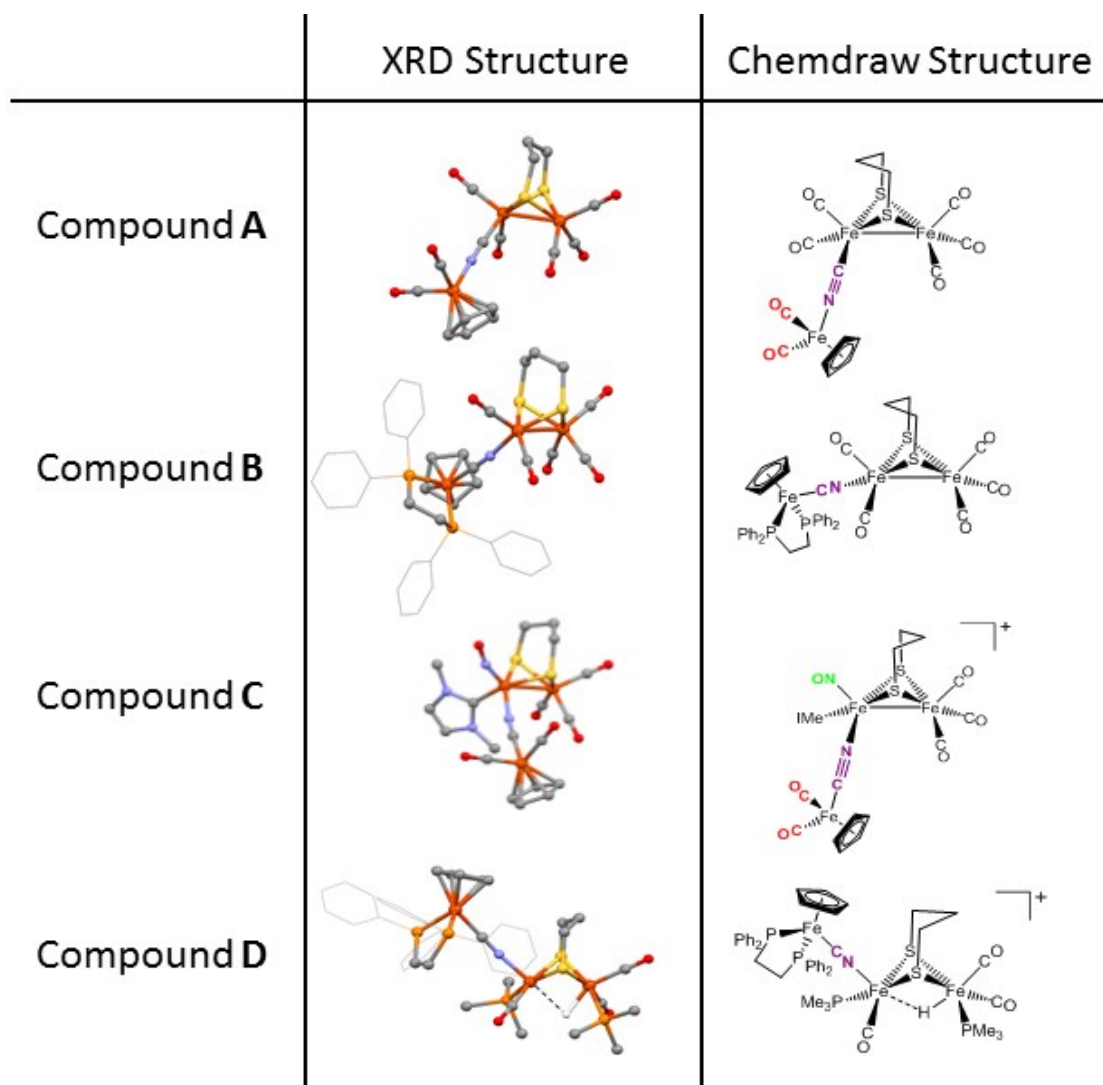

**Figure S27.** Structures for compounds A-D as determined by X-ray diffraction experiments with the analogous chemdraw structures. Hydrogen atoms and counter ions have been omitted for clarity and phenyl rings are in wireframe. Thermal ellipsoid plots are at 50% probability.

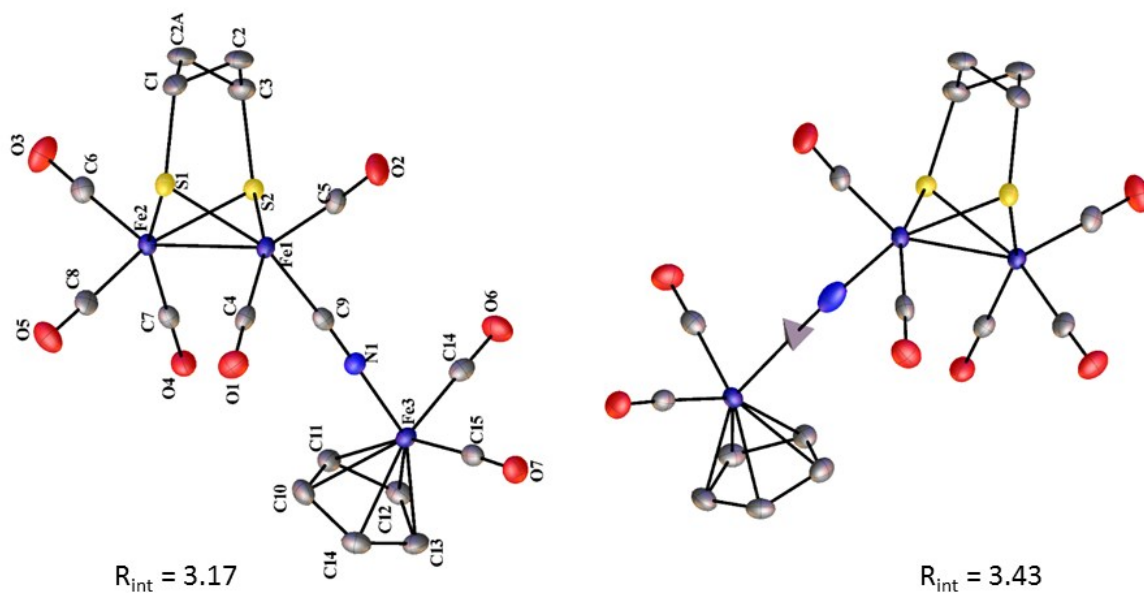

**Figure S28.** Comparison of the shape of the thermal ellipsoid plots and resulting refinement factor for the two cyanide orientations for Compound **A**. Hydrogens omitted for clarity.

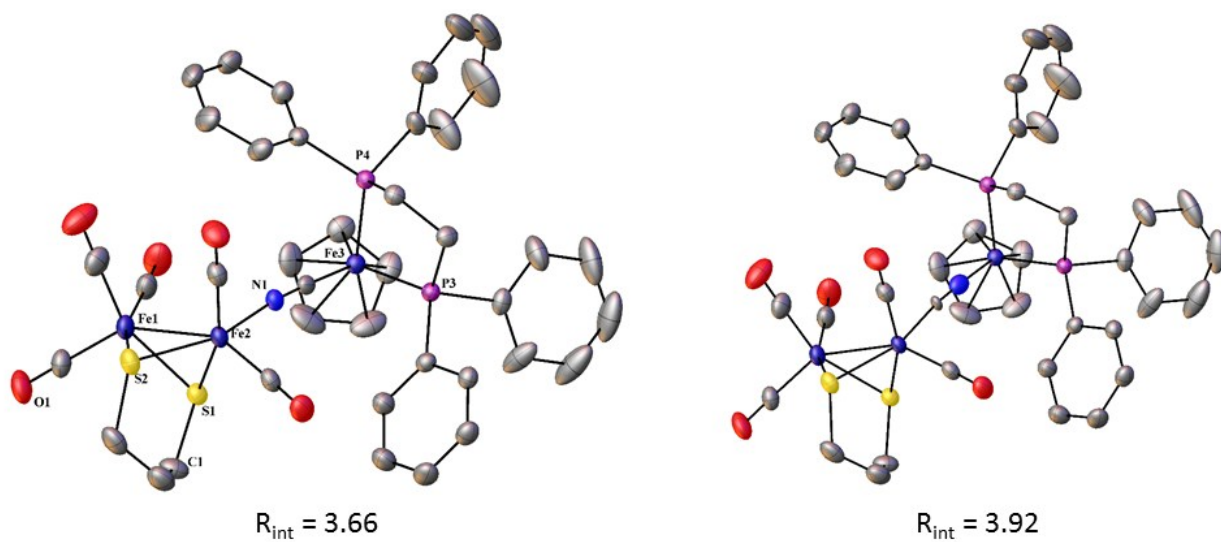

**Figure S29.** Comparison of the shape of the thermal ellipsoid plots and resulting refinement factor for the two cyanide orientations for Compound **B**. Hydrogens omitted for clarity.

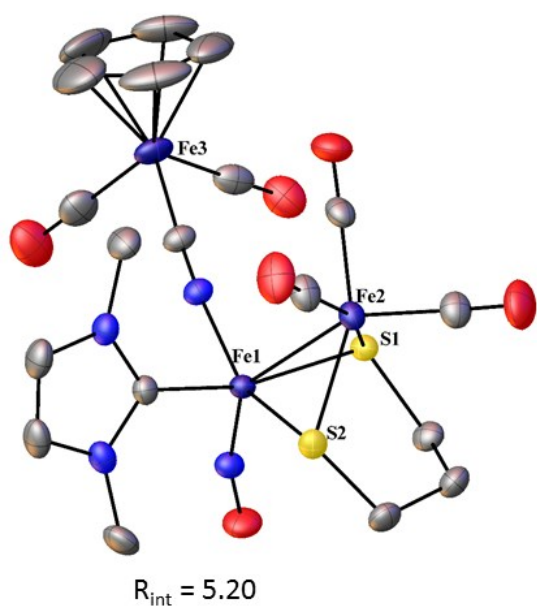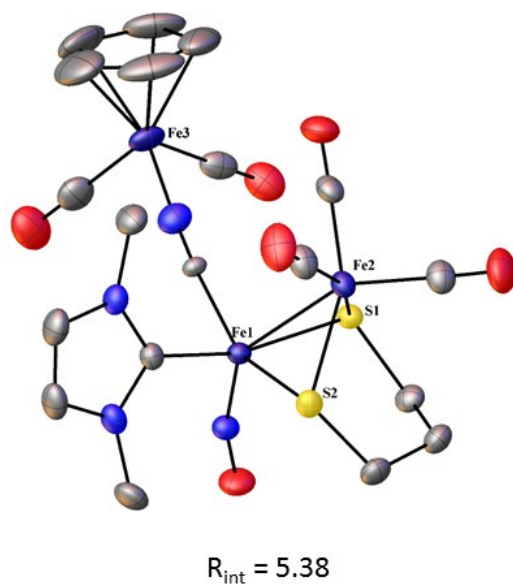

**Figure S30.** Comparison of the shape of the thermal ellipsoid plots and resulting refinement factor for the two cyanide orientations for Compound C. Counter ions have been omitted for clarity. Hydrogens omitted for clarity.

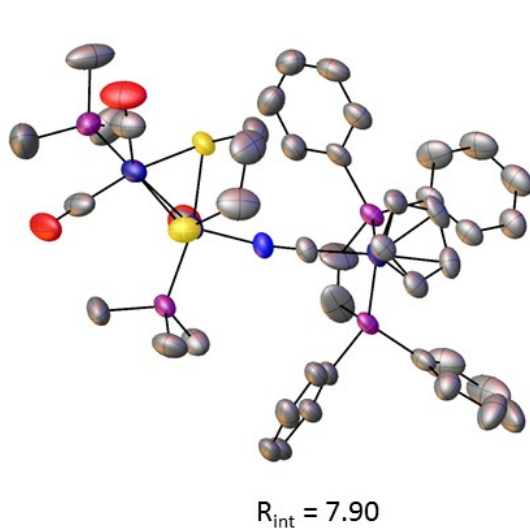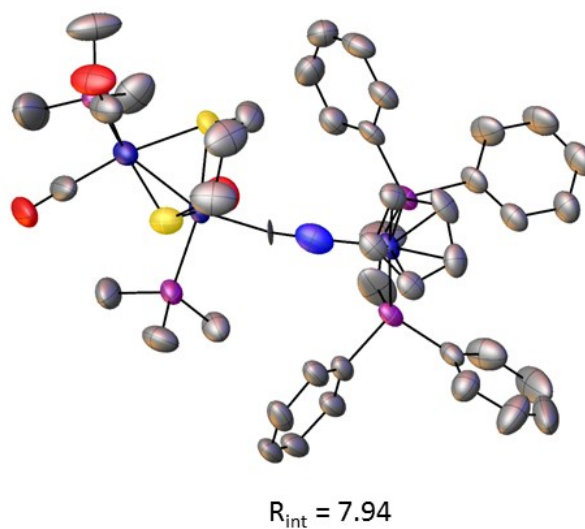

**Figure S31.** Comparison of the shape of the thermal ellipsoid plots and resulting refinement factor for the two cyanide orientations for Compound D. Counter ions have been omitted for clarity. Hydrogens omitted for clarity.

**Table S1.** Selected metric data of optimized structures in comparison to experimental values.

| Metric data | Complex A (Fe-NC-FeFe) |                |                | Complex B (Fe-CN-FeFe) |                |                | Complex C (Fe-CN-FeFe) |                |                | Complex D (Fe-CN-FeFe) |                |                |
|-------------|------------------------|----------------|----------------|------------------------|----------------|----------------|------------------------|----------------|----------------|------------------------|----------------|----------------|
|             | Exp.                   | Fe-NC-Fe<br>Fe | Fe-CN-Fe<br>Fe | Exp.                   | Fe-NC-Fe<br>Fe | Fe-CN-Fe<br>Fe | Exp.                   | Fe-NC-Fe<br>Fe | Fe-CN-Fe<br>Fe | Exp.                   | Fe-NC-Fe<br>Fe | Fe-CN-Fe<br>Fe |
| Fe-N        | 1.93<br>0              | 1.911          | 1.928          | 1.95<br>6              | 1.921          | 1.946          | 1.97<br>2              | 1.919          | 1.949          | 1.93<br>9              | 1.936          | 1.942          |
| N-C         | 1.15<br>2              | 1.177          | 1.170          | 1.15<br>8              | 1.179          | 1.179          | 1.14<br>7              | 1.174          | 1.172          | 1.17<br>2              | 1.182          | 1.184          |
| C-Fe        | 1.91<br>7              | 1.881          | 1.897          | 1.87<br>6              | 1.908          | 1.878          | 1.90<br>0              | 1.917          | 1.892          | 1.88<br>7              | 1.906          | 1.889          |
| Fe-N-<br>C  | 177.<br>6              | 176.2          | 177.5          | 170.<br>6              | 174.8          | 175.4          | 171.<br>4              | 175.3          | 169.6          | 171.<br>6              | 176.0          | 173.7          |
| N-C-F<br>e  | 177.<br>2              | 177.7          | 177.5          | 177.<br>1              | 177.5          | 177.0          | 177.<br>1              | 172.9          | 177.9          | 177.<br>4              | 175.1          | 176.0          |

Comments: Though C and N are similar in electron count and are expected to yield comparable diffractions when examined by X-ray crystallography, the metric data should be reliable regardless of the assignment of C or N. By comparing the differences between FeFe-C/N and Fe-C/N bond lengths, the experimental assignments of complexes **B-D** are confirmed by calculations. For complex **A**, the difference is too small to make a judgment.



**Table S2.** Computational IR frequencies in comparison with experimental values

| Complex | Orientation       | Vibrational frequency (cm <sup>-1</sup> ) |      |                                                         |
|---------|-------------------|-------------------------------------------|------|---------------------------------------------------------|
|         |                   | CN                                        | NO   | CO (Those from monoiron unit are underlined)            |
| A       | exp <sup>a</sup>  | 2128                                      | -    | 1930, 1955, 1986, <u>2026</u> , 2039, <u>2069</u>       |
|         | <b>Fe-NC-FeFe</b> | 2130                                      | -    | 1947, 1948, 1966, 1986, <u>2018</u> , 2023, <u>2058</u> |
|         | Fe-CN-FeFe        | 2173                                      | -    | 1944, 1945, 1963, 1986, <u>2017</u> , 2024, <u>2055</u> |
| B       | exp               | 2120                                      | -    | 1919, 1947, 1980, 2028, 2035                            |
|         | Fe-NC-FeFe        | 2102                                      | -    | 1932, 1954, 1961, 1976, 2021                            |
|         | <b>Fe-CN-FeFe</b> | 2100                                      | -    | 1929, 1952, 1957, 1975, 2020                            |
| C       | exp <sup>a</sup>  | 2154                                      | 1755 | 1995, <u>2024</u> , 2060, <u>2067</u>                   |
|         | Fe-NC-FeFe        | 2146                                      | 1810 | 1988, 2002, <u>2023</u> , 2051, <u>2063</u>             |
|         | <b>Fe-CN-FeFe</b> | 2155                                      | 1795 | 1986, 2002, <u>2023</u> , 2051, <u>2060</u>             |
| D       | exp               | 2081                                      | -    | 1949, 1964, 2020                                        |
|         | Fe-NC-FeFe        | 2078                                      | -    | 1941, 1972, 2016                                        |
|         | <b>Fe-CN-FeFe</b> | 2063                                      | -    | 1939, 1970, 2014                                        |

a. The origins of CO frequencies cannot be distinguished solely based on frequencies.

Generally the calculated frequencies match the experimental values with an error less than 20 cm<sup>-1</sup>. The differences between two linkage isomers are trivial therefore the determination of the structure by IR frequencies is feasible.

**Table S3.** Experimental and computational EPR parameters for complex D<sup>+</sup>.

| Orientation                  | Hyperfine constants $A_{xyz}$ (MHz)                       |              |                         |                                 |                                  | Quadrupole<br>Con-stant $K$<br>(MHz)<br>$^{14}\text{N}$ ( $I = 1.0$ ) |       |
|------------------------------|-----------------------------------------------------------|--------------|-------------------------|---------------------------------|----------------------------------|-----------------------------------------------------------------------|-------|
|                              | Two $^{31}\text{P}$ ( $a = 100\%$ ) on the mono-iron unit |              |                         | $^{13}\text{C}$ ( $a = 1.1\%$ ) | $^{14}\text{N}$ ( $a = 99.6\%$ ) |                                                                       |       |
| CW EPR (Exp.)                | - 97, -60, -97                                            |              |                         | -90, -50, -90                   | Not detected                     | ---                                                                   | --    |
| HYSCORE (Exp.)*              | --                                                        |              |                         | --                              | --                               | 2, 3, 4                                                               | 0.5   |
| Fe-NC-FeFe<br>(Calc.)        | -76.02,<br>110.43                                         | -77.58,<br>- | -76.55,<br>-77.15,<br>- | 110.67                          | -0.70, -3.68, 9.88               | -8.63, -9.67, -                                                       | -0.34 |
| <b>Fe-CN-FeFe</b><br>(Calc.) | -85.86,<br>122.74                                         | -87.37,<br>- | -84.75,<br>-85.72,<br>- | 120.85                          | -43.85, -52.11, -                | -1.55, -2.27, 7.94                                                    | -0.69 |

The hyperfine coupling of  $^{14}\text{N}$  in the Fe-CN-FeFe isomer is calculated to be relatively small as expected because of the distance between N and the spin center (mono-iron unit). The hyperfine coupling of  $^{13}\text{C}$  is hard to observe because of the low natural abundance of  $^{13}\text{C}$ . The hyperfine coupling constants of  $^{31}\text{P}$  match fitted values from simulations to the same extent, regardless of the orientation of CN.

\*Simulation parameters are as shown presenting the range of the HFC components. Field dependent HYSCORE is required in order to obtain quantitative anisotropic components of the  $^{14}\text{N}$  HFC which was not possible due to sensitivity issues at  $g_1$  and  $g_3$ .

**Table S4.** Energy profiles (Gibbs free energy in kcal/mol) of cyanide flipping with H-bond providers

| H-bond provider (P)             | Fe-CN-FeFe | Fe-CN-FeFe + P | TS( + P) | Fe-NC-FeFe + P | Fe-NC-FeFe |
|---------------------------------|------------|----------------|----------|----------------|------------|
| None <sup>a</sup>               | 0          | --             | 34.1     | --             | 1.0        |
| H <sub>2</sub> O                | 0          | 6.0            | 34.3     | 7.5            | 1.0        |
| (H <sub>2</sub> O) <sub>2</sub> | 0          | 9.8            | 43.2     | 12.1           | 1.0        |
| Urea                            | 0          | 4.2            | 39.4     | 6.0            | 1.0        |
| Hpy <sup>+</sup>                | 0          | 2.8            | 36.1     | 4.8            | 1.0        |

- a. In addition to thermal and solvation corrections, empirical dispersion (GD3BJ) is also added to fully evaluate the contributions from possible H-bonds. Therefore the values of the CN-bridged complexes are slightly different from those in the text without the dispersion.

**Table S5.** Crystal data and structure refinement for Compound A

|                                   |                                                                                 |                   |
|-----------------------------------|---------------------------------------------------------------------------------|-------------------|
| Identification code               | cn                                                                              |                   |
| Empirical formula                 | C <sub>16</sub> H <sub>11</sub> Fe <sub>3</sub> N O <sub>7</sub> S <sub>2</sub> |                   |
| Formula weight                    | 560.93                                                                          |                   |
| Temperature                       | 110.15 K                                                                        |                   |
| Wavelength                        | 0.71073 Å                                                                       |                   |
| Crystal system                    | Triclinic                                                                       |                   |
| Space group                       | P -1                                                                            |                   |
| Unit cell dimensions              | a = 7.7263(14) Å                                                                | α = 94.504(10)°.  |
|                                   | b = 11.203(2) Å                                                                 | β = 108.019(10)°. |
|                                   | c = 11.900(2) Å                                                                 | γ = 93.687(10)°.  |
| Volume                            | 972.3(3) Å <sup>3</sup>                                                         |                   |
| Z                                 | 2                                                                               |                   |
| Density (calculated)              | 1.916 Mg/m <sup>3</sup>                                                         |                   |
| Absorption coefficient            | 2.463 mm <sup>-1</sup>                                                          |                   |
| F(000)                            | 560                                                                             |                   |
| Crystal size                      | 0.12 x 0.1 x 0.08 mm <sup>3</sup>                                               |                   |
| Theta range for data collection   | 1.809 to 27.575°.                                                               |                   |
| Index ranges                      | -10 ≤ h ≤ 9, -14 ≤ k ≤ 14, 0 ≤ l ≤ 15                                           |                   |
| Reflections collected             | 4458                                                                            |                   |
| Independent reflections           | 4458 [R(int) = ?]                                                               |                   |
| Completeness to theta = 25.242°   | 99.7 %                                                                          |                   |
| Absorption correction             | Semi-empirical from equivalents                                                 |                   |
| Max. and min. transmission        | 0.745 and 0.581                                                                 |                   |
| Refinement method                 | Full-matrix least-squares on F <sup>2</sup>                                     |                   |
| Data / restraints / parameters    | 4458 / 6 / 267                                                                  |                   |
| Goodness-of-fit on F <sup>2</sup> | 1.051                                                                           |                   |
| Final R indices [I > 2σ(I)]       | R1 = 0.0317, wR2 = 0.0756                                                       |                   |
| R indices (all data)              | R1 = 0.0380, wR2 = 0.0788                                                       |                   |
| Extinction coefficient            | n/a                                                                             |                   |
| Largest diff. peak and hole       | 0.516 and -0.467 e.Å <sup>-3</sup>                                              |                   |

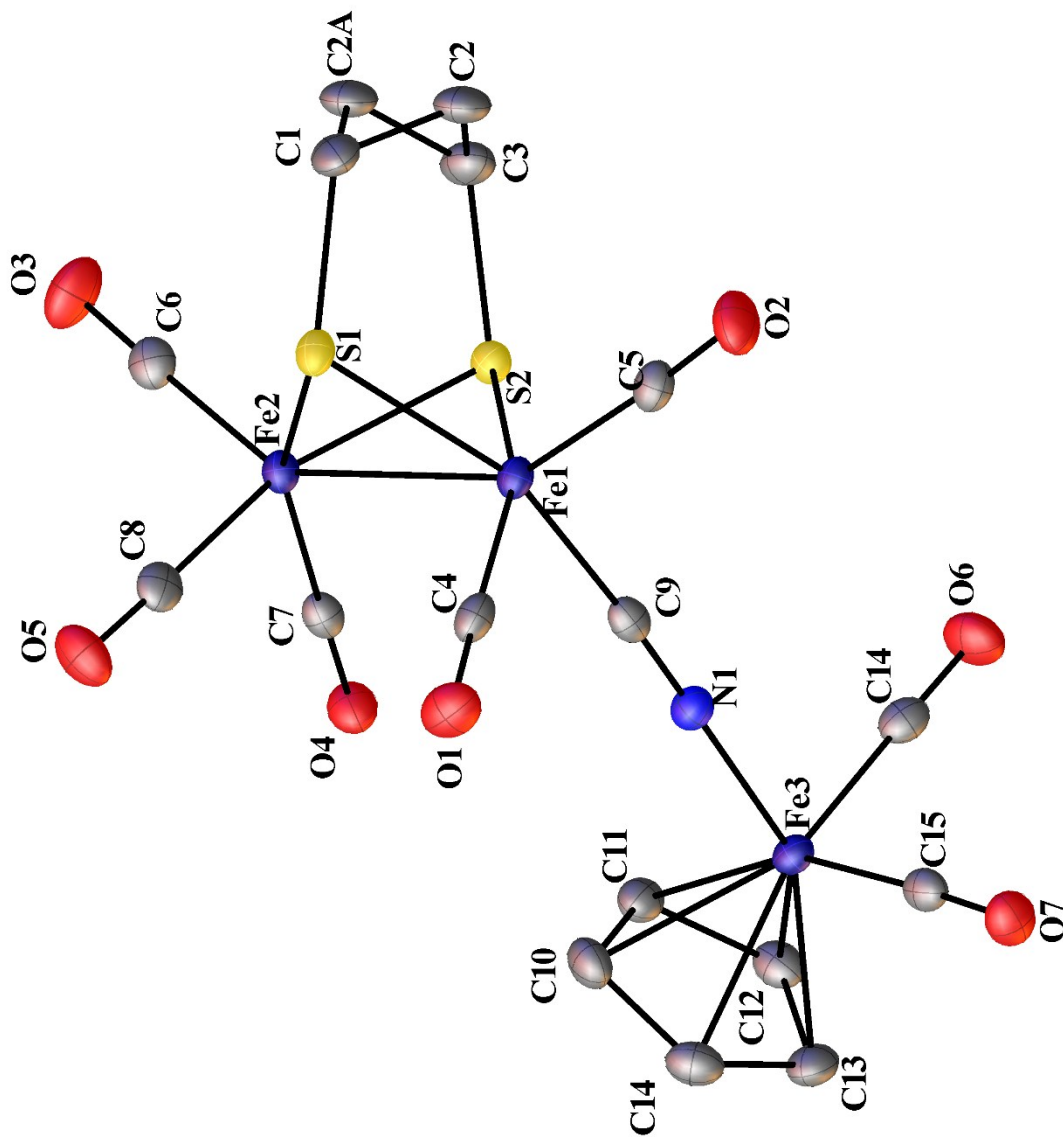

Figure S32. Thermal ellipsoid plot at 50% probability for Compound A. Hydrogens omitted for clarity.

**Table S6.** Crystal data and structure refinement for Compound **B**.

|                                   |                                                                                                |                  |
|-----------------------------------|------------------------------------------------------------------------------------------------|------------------|
| Identification code               | pdtisomer                                                                                      |                  |
| Empirical formula                 | C <sub>40</sub> H <sub>35</sub> Fe <sub>3</sub> N O <sub>5</sub> P <sub>2</sub> S <sub>2</sub> |                  |
| Formula weight                    | 903.30                                                                                         |                  |
| Temperature                       | 150.15 K                                                                                       |                  |
| Wavelength                        | 0.71073 Å                                                                                      |                  |
| Crystal system                    | Triclinic                                                                                      |                  |
| Space group                       | P-1                                                                                            |                  |
| Unit cell dimensions              | a = 11.3103(15) Å                                                                              | α = 105.449(5)°. |
|                                   | b = 12.9416(18) Å                                                                              | β = 100.216(5)°. |
|                                   | c = 15.479(2) Å                                                                                | γ = 110.921(4)°. |
| Volume                            | 1944.2(5) Å <sup>3</sup>                                                                       |                  |
| Z                                 | 2                                                                                              |                  |
| Density (calculated)              | 1.543 Mg/m <sup>3</sup>                                                                        |                  |
| Absorption coefficient            | 1.339 mm <sup>-1</sup>                                                                         |                  |
| F(000)                            | 924                                                                                            |                  |
| Crystal size                      | 0.15 x 0.14 x 0.1 mm <sup>3</sup>                                                              |                  |
| Theta range for data collection   | 2.023 to 27.898°.                                                                              |                  |
| Index ranges                      | -14 ≤ h ≤ 14, -16 ≤ k ≤ 16, -20 ≤ l ≤ 20                                                       |                  |
| Reflections collected             | 87852                                                                                          |                  |
| Independent reflections           | 9112 [R(int) = 0.0396]                                                                         |                  |
| Completeness to theta = 25.242°   | 99.9 %                                                                                         |                  |
| Absorption correction             | Semi-empirical from equivalents                                                                |                  |
| Max. and min. transmission        | 0.7456 and 0.6533                                                                              |                  |
| Refinement method                 | Full-matrix least-squares on F <sup>2</sup>                                                    |                  |
| Data / restraints / parameters    | 9112 / 90 / 478                                                                                |                  |
| Goodness-of-fit on F <sup>2</sup> | 1.037                                                                                          |                  |
| Final R indices [I > 2σ(I)]       | R1 = 0.0366, wR2 = 0.0864                                                                      |                  |
| R indices (all data)              | R1 = 0.0469, wR2 = 0.0946                                                                      |                  |
| Extinction coefficient            | n/a                                                                                            |                  |
| Largest diff. peak and hole       | 1.370 and -0.472 e.Å <sup>-3</sup>                                                             |                  |

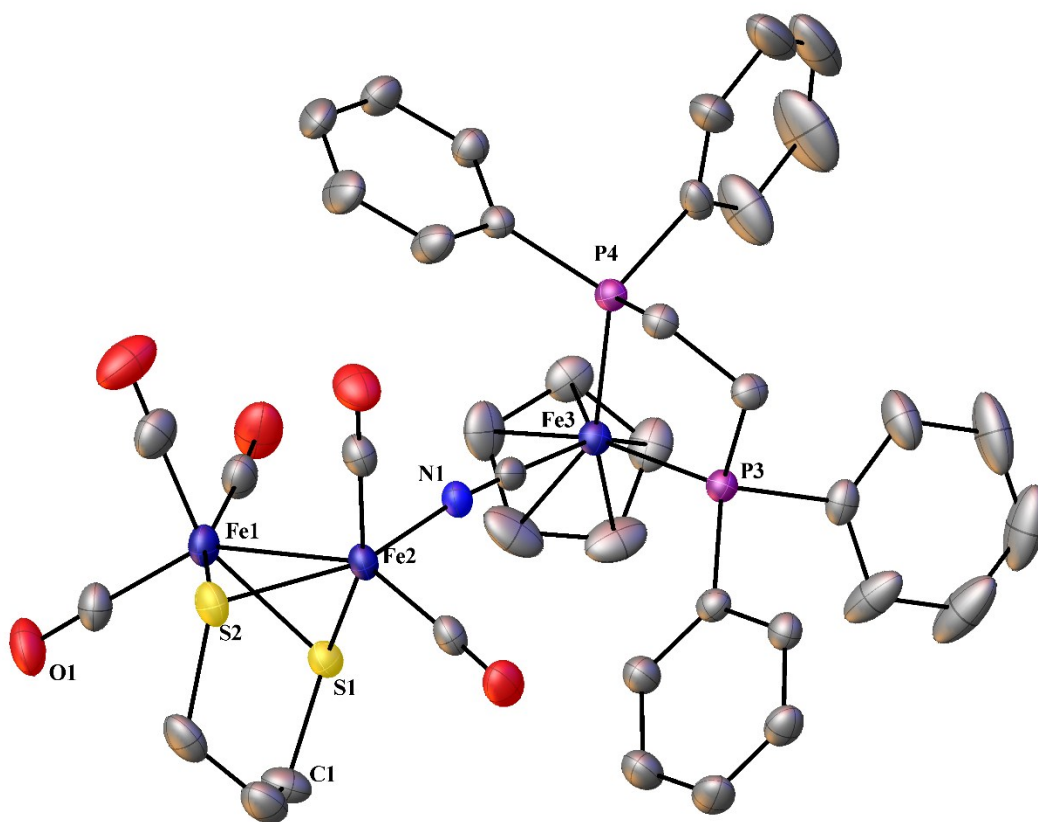

**Figure S33.** Thermal ellipsoid plot at 50% probability for **B**. Hydrogens omitted for clarity.

**Table S7.** Crystal data and structure refinement for Compound C.

|                                   |                                             |                              |
|-----------------------------------|---------------------------------------------|------------------------------|
| Identification code               | 8314                                        |                              |
| Empirical formula                 | C20.20 H22.23 B F4 Fe3 N4.60 O6.72 S2       |                              |
| Formula weight                    | 755.40                                      |                              |
| Temperature                       | 110.15 K                                    |                              |
| Wavelength                        | 0.71073 Å                                   |                              |
| Crystal system                    | Triclinic                                   |                              |
| Space group                       | P-1                                         |                              |
| Unit cell dimensions              | a = 10.4593(5) Å                            | $\alpha = 76.988(2)^\circ$ . |
|                                   | b = 11.6085(6) Å                            | $\beta = 85.341(2)^\circ$ .  |
|                                   | c = 12.2560(6) Å                            | $\gamma = 81.750(2)^\circ$ . |
| Volume                            | 1433.02(12) Å <sup>3</sup>                  |                              |
| Z                                 | 2                                           |                              |
| Density (calculated)              | 1.751 Mg/m <sup>3</sup>                     |                              |
| Absorption coefficient            | 1.717 mm <sup>-1</sup>                      |                              |
| F(000)                            | 761                                         |                              |
| Crystal size                      | 0.142 x 0.10 x 0.038 mm <sup>3</sup>        |                              |
| Theta range for data collection   | 1.970 to 30.797°.                           |                              |
| Index ranges                      | -14 ≤ h ≤ 14, -16 ≤ k ≤ 16, -17 ≤ l ≤ 17    |                              |
| Reflections collected             | 46532                                       |                              |
| Independent reflections           | 8411 [R(int) = 0.0436]                      |                              |
| Completeness to theta = 25.242°   | 99.8 %                                      |                              |
| Absorption correction             | Semi-empirical from equivalents             |                              |
| Max. and min. transmission        | 0.7461 and 0.6145                           |                              |
| Refinement method                 | Full-matrix least-squares on F <sup>2</sup> |                              |
| Data / restraints / parameters    | 8411 / 66 / 369                             |                              |
| Goodness-of-fit on F <sup>2</sup> | 1.055                                       |                              |
| Final R indices [I > 2σ(I)]       | R1 = 0.0520, wR2 = 0.1487                   |                              |
| R indices (all data)              | R1 = 0.0658, wR2 = 0.1629                   |                              |
| Extinction coefficient            | n/a                                         |                              |
| Largest diff. peak and hole       | 2.007 and -1.856 e.Å <sup>-3</sup>          |                              |



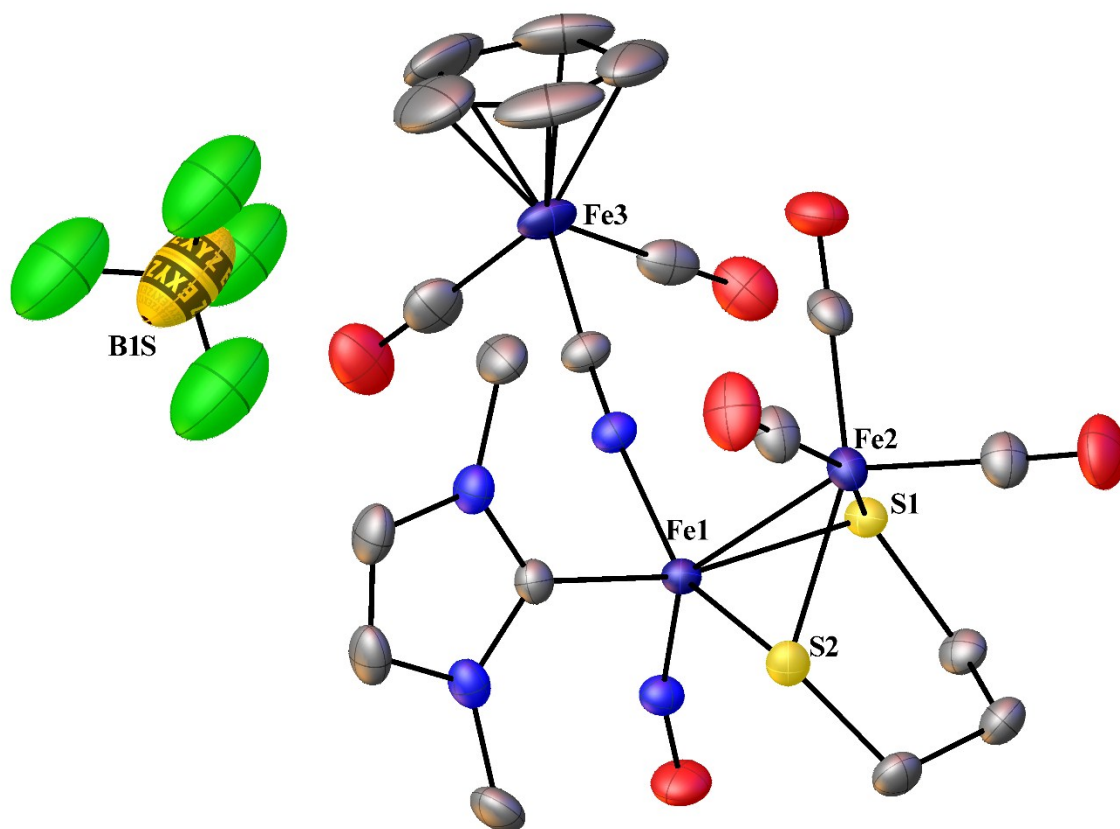

**Figure S34.** Thermal ellipsoid plot at 50% probability for C. Hydrogens omitted for clarity.

**Table S8.** Crystal data and structure refinement for Compound **D**.

|                                   |                                                                                                                  |                 |
|-----------------------------------|------------------------------------------------------------------------------------------------------------------|-----------------|
| Identification code               | twin4                                                                                                            |                 |
| Empirical formula                 | C <sub>80</sub> H <sub>75</sub> B F <sub>24</sub> Fe <sub>3</sub> N O <sub>4</sub> P <sub>4</sub> S <sub>2</sub> |                 |
| Formula weight                    | 1936.77                                                                                                          |                 |
| Temperature                       | 150.15 K                                                                                                         |                 |
| Wavelength                        | 0.71073 Å                                                                                                        |                 |
| Crystal system                    | Triclinic                                                                                                        |                 |
| Space group                       | P-1                                                                                                              |                 |
| Unit cell dimensions              | a = 13.352(5) Å                                                                                                  | α = 92.828(5)°. |
|                                   | b = 13.623(5) Å                                                                                                  | β = 94.410(5)°. |
|                                   | c = 24.074(8) Å                                                                                                  | γ = 99.584(5)°. |
| Volume                            | 4296(3) Å <sup>3</sup>                                                                                           |                 |
| Z                                 | 2                                                                                                                |                 |
| Density (calculated)              | 1.497 Mg/m <sup>3</sup>                                                                                          |                 |
| Absorption coefficient            | 0.723 mm <sup>-1</sup>                                                                                           |                 |
| F(000)                            | 1970                                                                                                             |                 |
| Crystal size                      | 0.15 x 0.09 x 0.08 mm <sup>3</sup>                                                                               |                 |
| Theta range for data collection   | 2.138 to 23.850°.                                                                                                |                 |
| Index ranges                      | ?<=h<=?, ?<=k<=?, ?<=l<=?                                                                                        |                 |
| Reflections collected             | ?                                                                                                                |                 |
| Independent reflections           | 13129 [R(int) = ?]                                                                                               |                 |
| Completeness to theta = 25.242°   | 84.5 %                                                                                                           |                 |
| Absorption correction             | Semi-empirical from equivalents                                                                                  |                 |
| Max. and min. transmission        | 0.744 and 0.622                                                                                                  |                 |
| Refinement method                 | Full-matrix least-squares on F <sup>2</sup>                                                                      |                 |
| Data / restraints / parameters    | 13129 / 0 / 1080                                                                                                 |                 |
| Goodness-of-fit on F <sup>2</sup> | 1.082                                                                                                            |                 |
| Final R indices [I>2sigma(I)]     | R1 = 0.0790, wR2 = 0.2135                                                                                        |                 |
| R indices (all data)              | R1 = 0.1091, wR2 = 0.2317                                                                                        |                 |
| Extinction coefficient            | n/a                                                                                                              |                 |
| Largest diff. peak and hole       | 2.070 and -0.534 e.Å <sup>-3</sup>                                                                               |                 |

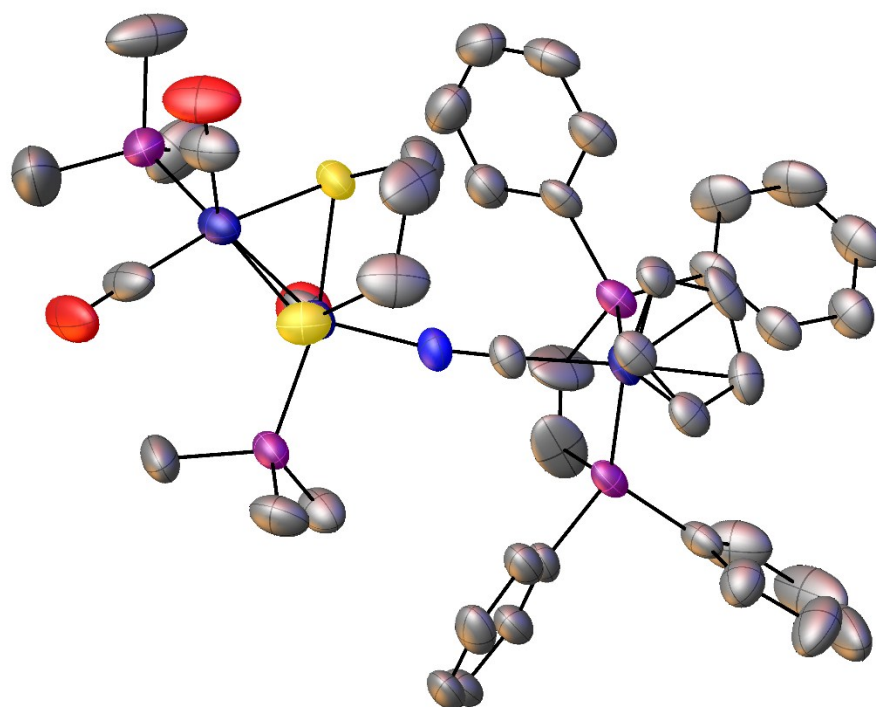

**Figure S35.** Thermal ellipsoid plot at 50% probability for **D**. Hydrogens and counter ion omitted for clarity.
